# Supplementary material for: Methods and uncertainty-estimations of 3D structural modelling in crystalline rocks: A case study
Source: Copernicus journal article supplement (doi:10.5194/se-2017-47), 2017-05-12
Supplement: Supplementary file [file se-2017-47-AC1-supplement.pdf]

All comments are numbered in the following manner:

X.Xa referee comment

X.Xb author response

X.Xc changes in the manuscript

1. Authors response to interactive comments by Clare Bond on "Methods and uncertainty-estimations of 3D structural modelling in crystalline rocks: A case study" by Raphael Schneeberger et al.

*Specific comments*

- 1.1a Introduction Page 5 line 9 Do you use dip information or purely strike? This makes a big difference in terms of how you can construct a schematic 3d block diagram (Figure 2).
- 1.1b Only the strike of the structures was used to draw the 3d block diagram (Fig. 2). Because the structures are subvertically dipping (see Fig. 7) this simplified approach seems to be justified.
- 1.2a Discussion Page 17 lines 19-20 Can you explain/expand the sentence starting “Therefore, faults...” So the impact of the modelling and the best-fit model is clear. Where is the centre of the rotation? Is it in a single plane? Do you really mean rotation in this sense?
- 1.2b We apologize for raising here confusion by using ‘rotation’. The term ‘rotation’ was removed and the sentence rephrased to improve clarity.
- 1.2c New: The N-S extent of surface area is larger compared to the GTS area, leaving a northern and a southern surface part underneath which no underground data exists (Fig. 10). Hence faults in these domains are forced by the model setup to be connected to the underground, leading to artificial fault orientations in these two cases (N and S rims of Fig. 13a). For that reason, only faults in the central part of the ‘best estimate’ model will be further considered.
- 1.3a Page 17 lines 20-22 You introduce the effect of boundary conditions here, and make an assertion in line 20 that because the observations are different in the GTS then there must be boundary condition effects. But in lines 11-14 you discuss differences in the outcrop on the surface and in the GTS, due to vegetation cover, and the ability to identify faults. I think there are modelling reasons why you might have boundary affects. You should discuss these, rather than simply saying it doesn’t fit out observations so there must be effects.
- 1.3b Paragraph was adapted according to the previous comment.

*Technical corrections*

- 1.4a Abstract Page 2 line 4 Insert ‘a’ between ‘as’ and ‘study area’
- 1.4b 'a' was added as suggested
- 1.5a Introduction Page 3 lines 2-5 The reference to Bond et al. (2007) (as reference in the reference list) should be referenced in line 2. In line 3 the reference should be to Bond et al. (2007b). Knowledge Transfer in a digital world: Field data acquisition, uncertainty and data management. Geosphere 3 (6), 568-575.
- 1.5b Reference was changed and added to the reference list
- 1.6a Geological Setting Page 5 Figure 2 A North arrow would be useful.
- 1.6b North arrow already existed in the figure but obviously was not visible enough. We enlarged the North arrow.
- 1.7a Page 5 line 19 I would refer to figure 2 again here.
- 1.7b Reference was added
- 1.8a Methods Page 7 line 11 The word ‘obtaining ‘ is in the wring place in the sentence. Change to “...remote sensing allowed a structural surface map to be obtained.”
- 1.8b Sentence was changed according to suggestion

1.9a Page 7 line 39 Could you expand this sentence to provide a bit more context, again you could refer back to figure 2.

1.9b Sentence was changed in order to clarify the context.

1.9c New: Only structures within the same orientation group (group A, B, C; Fig. 2) were compared.

1.10a Page 8 Figure 4 Expand the figure caption to discuss the outline of the GTS and the elements annotated in the figure.

1.10b Caption was expanded.

1.10c Schematic drawing of hypothetical example for validation of 3D models based on angular and distance misfit (map view). The contours of the GTS are shown in grey with a mapped fault trace and a fault trace resulting from projection of the fault plane from the surface.

1.11a Page 9 Figure 5 Expand the figure caption to explain the different elements in the figure.

1.11b Based on comment by Gauthier Laurent this figure was deleted.

1.12a Page 9 Figure 6 The caption for c) could be clearer, suggest change to “.....10,000 times and all patterns are compared, the number of crossing faults within the generated pattern are minimized by addition a penalty factor yielding a : :”

1.12b Caption (c) was reformulated to improve clarity.

1.12c New: (c) For every surface point one underground point is picked and connected by a projection line (hypothetical fault plane). By connecting each surface point with one underground point a connection pattern results. Ten thousand runs were now performed, each connecting different surface and underground points. The 10'000 connection patterns are compared with each other, and evaluated by a penalty criterion. This penalty criterion addresses the number of crossings and rates solutions with lowest number of fault plane crossings highest, yielding in a probability for connecting a specific surface point to a certain underground point.

1.13a Page 9 line 13 The information in brackets is not clear suggest removal of ‘in the’ to improve clarity.

1.13b Information in brackets was adapted to improve clarity.

1.13c New: (A, B, C; following Fig. 2).

1.14a Results Page 12 line 14 Insert “(GTS) facility” at the end of the sentence “... mapped in the underground...”.

1.14b Addition performed based on suggestion

1.15a Page 13 line 13 Delete “above-presented” it does not add anything and makes the point of the sentence harder to follow.

1.15b "above-presented" was removed

1.16a Page 13 line 14 Ditto remove “mapped in the underground”

1.16b "mapped in the underground " was removed.

1.17a Discussion Page 18 line 5 This sentence is not well constructed, suggest change to “We initially compared the three extrapolation: : :..”

1.17b Sentence was reformulated to improve the sentence construction

1.17c New: We compared the three extrapolation techniques based on the ‘maximum a posteriori’ model (Fig. 14).

1.18a Page 18 line 13 Add “The” before “extrapolation 3D structural model...”.

1.18b 'The' was added.

1.19a Page 18 line 14 It feels like the end of this sentence needs a bit more... “obtained dips vary substantially” from what? How?

1.19b End of the sentence was deleted to improve clarity.

- 2.1 Authors response to interactive comments by an anonymous referee on "Methods and uncertainty-estimations of 3D structural modelling in crystalline rocks: A case study" by Raphael Schneeberger et al.

*Specific comments*

- 2.1a S1: In the introduction, the authors state three main goals (Page 3, line 11): (i) development of an extrapolation workflow for different techniques, (ii) estimation of related uncertainties, (iii) design and application of a probabilistic approach to validate the generated models. The first two goals are not completely clear to me. The third point is clearly tackled within the article and seems to be the most interesting part of the paper. It is not clear to me if the goal is to validate some of the generated models using posterior information (i.e. crossing faults are unlikely), or if the goal is to choose which of the extrapolation technique is the most accurate in this context. I am not sure that the development of extrapolation techniques to build surfaces from points is the goal this paper. Furthermore, the two first points of the conclusion (lineament maps are sensitive to erosion and structural mapping highlight three fault families) are not related to the main subject of the paper. I think refocusing the discussion and the conclusion on the questions stated in the introduction would be beneficial.
- 2.1b By reading the reviewer's comment we realize that the definition of the primary goal was rather unclear, since it is unclear what different techniques mean, requiring the add 'different techniques for projection of surface structures to depth'. The goals as presented in the introduction were therefore rephrased in order to be more inline with the discussion and the conclusion. Indeed we do not develop extrapolation techniques but we apply already existing techniques and discuss their relevance and quality. It was attempted to compare different extrapolation techniques and possibly gain information from the well-constrained study site for less constrained sites. The two first points of the conclusion are not directly linked to the main focus of the paper, however they are inherently part of a 3D structural modelling exercise, as it would be performed for another study site. Therefore, we think that they should be mentioned within the conclusion but we merged (i) and (ii) since they are ultimately linked to each other.
- 2.1c New: In this study, we focus on deformed basement rocks and the extrapolation of faults to depth. We follow two main goals: (i) application of an extrapolation workflow for three different techniques for projection of surface structures to depth considering associated projection uncertainties, and (ii) design and application of a probabilistic approach to compare different extrapolation techniques in order to validate the generated models.
- 2.2a S2: The extrapolation methods (Page 7, Line 25) should be described more accurately. Delaunay triangulation is a meshing algorithm that give a triangulation from several points. It provides a surfacic interpolation between points, but no extrapolation. Using only points from the trace of the fault on the surface to compute the dip is highly sensitive to noise (because point are nearly aligned along a line).
- 2.2b The description of Delaunay triangulation was expanded as suggested.
- 2.2c New: (ii) Delaunay triangulation is a meshing algorithm that produces a triangulation for several points such that for a given point cloud no point of the point cloud is inside the circumcircle of any triangle connecting three points of the point cloud (Delaunay, 1934). It results in a 3D surface interpolating the selected points. Based on this 3D surface, the entire fault trace can be extrapolated. Noise can arise because of rugosities of the fault planes, uncertainties of tracing the fault intersection at the surface, and too low vertical variations in topography. In the case of near planar faults, the noise is reduced in the case of high variations in altitude between valleys and mountain peaks as well as by preferring projections of long fault traces over those of short fault segments.
- 2.3a S3: Data at depth are not integrated during structural modelling, and are use as posterior data by computing the misfit between observations and model. This is always the case for data that can not be integrated as constraints during structural modelling (flow simulations, geophysical data). However, in this case, fault observations at depth could be integrated as control points during interpolation. The choice to use them as posterior data should be explain.
- 2.3b This is exactly the benefit of the current study. In a majority of cases, the subsurface information is

not available. On purpose, we therefore ‘blindly’ apply the known extrapolation techniques on purpose, without considering the existing depth data, since we intend to learn more about the real uncertainties related to the extrapolation. Therefore, we used the underground information solely as posterior in order to closely simulate a common application with the option of validation and assessment for cases without underground information.

We added a sentence to the discussion to improve clarity about this point.

- 2.3c New: Lastly, the uncommonly well-constrained setting of our study site (high-resolution underground data) was used to test and potentially validate extrapolation techniques for common application. Therefore, the underground data was only integrated as validation and not as constraint during interpolation.
- 2.4a S4: Figure 2, 5, 7, 9, 10, 11, 14: images and text contained within images are too small to be read. This is a major problem for Figure 10: I can not read the results. 3D illustrations provided in the Supplement are not called within the core of the paper.
- 2.4b Figures adjusted according to graphic requirements of Solid Earth Journal. A sentence was added in chapter 4.3 at page 13 line 11
- 2.4c New: All 3D models are provided as supplementary material.

#### *Technical corrections*

- 2.5a = Page 2 = Page 2, line 11: Where does these 6 per cent come from? I only see this number in the abstract and in the conclusion?
- 2.5b The 6% of distance misfit were removed from the manuscript as they were based on the distance misfit, which is methodologically questionable as shown by comments of Clare Bond and Gautier Laurent.
- 2.6a Page 2, Line 23: As you use explicit modeling approaches in this article, maybe you could remove the differences between implicit and explicit methods. You could also spend more time reviewing existing stochastic and deterministic modeling methods. This might be useful before presenting your deterministic modeling method informed by probability.
- 2.6b The introduction paragraph on the differences of explicit and implicit modelling was removed. Further, the paragraph on explicit modelling was extended based on suggested review of existing modelling methods.
- 2.6c New: Explicit structural modelling can further be subdivided into stochastic and deterministic methods. Deterministic approaches yield a single output for input parameters, analogous to drawing a map, (e.g. Stephens et al., 2015), whereas as in stochastic approaches parameters are defined by a probabilistic density function with a component of randomness (e.g. Cherpeau and Caumon, 2015; González-García and Jessell, 2016; Jørgensen et al., 2015; Koike et al., 2015).
- 2.7a Page 2, Line 40: "extrapolation represents the main uncertainty within 3D structural modelling". This may not always be the case. Hollund et al, 2002 shows that subseismic faults represent a large uncertainty in flow simulation. More generally, when working with sparse or low-resolution data, the topology of the fault network (number of faults and their connectivity) is highly uncertain and strongly impact flow simulations [Cherpeau et al, 2012; Cherpeau et al, 2015; Julio et al, 2015].
- 2.7b The sentence was rephrased in order to enhance clarity.
- 2.7c New: Previous studies report that this extrapolation represents a main uncertainty within 3D structural modelling of known structures (e.g. Baumberger, 2015; Bistacchi et al., 2008). From environments with sparse data, the topology of the fault network is known to be highly uncertain (e.g. Cherpeau et al., 2012; Cherpeau and Caumon, 2015).
- 2.8a = Page 3 = Line 8: "Most of these published studies were performed where [...] tectonic setting is rather simple". The word "simple" is rather subjective and might offend people who have been/are working on this topic.
- 2.8b Sentence was rephrased to avoid offending others work.
- 2.8c New: Most of these published studies were performed within sedimentary environments where parameters such as stratigraphy, layer thickness, layer orientation, and structural setting are well constrained.



2.9a Line 12: (TYPO) Development -> development

2.9b 'Typo' was adapted

2.10a Line 14: "to validate the generated model". It is not clear to me if you want to validate one of the generated structural models, or if you want to validate one of the 3 structural modeling method (field data/Delaunay/moment of inertia)

2.10b Point (iii) of the goals was expanded to clarify the goal

2.10c New: design and application of a probabilistic approach to validate the generated model and to compare different extrapolation techniques

2.11a = Page 4 = Line 1: title should be after the figure to be visible.

2.11b Title was moved.

2.12a = Page 6 = Figure 3: This figure is not clear. It can not be understood without reading carefully the text. Action verb might could used to distinguish input and output (lineament maps, structural map, best model) from what you do (Modeling 3D structure, Computing degree of misfit...). Caption should be extended.

2.12b Figure was adapted and caption extended.

2.12c New: Figure 3. Employed modelling workflow to generate a 3D structural model of the area based on a surface lineament map. As a major step, the workflow also considers the uncertainty related to connection between mapped faults at surface and in the underground.

2.13a = Page 7 = Line 3: How many lineaments do you have?

2.13b 5277 lineaments (Chapter 4.1.)

2.14a Line 32: (BIBLIO) Fernandez 2005 does not details the Move ribbon tool but a method to find a plane orientation from a point cloud. A distinction between the method, and it software implementation would be more precise. Futhermore, it is always difficult to derive a plane orientation from points aligned along a line (intersection between the topography and the fault). The eigenvalues found should help to detect when point are aligned along a line. This does not seems to be used within the paper (see specific comment S2).

2.14b The sentence was expanded as suggested in order to be more precise. Indeed the eigenvalues are of great help but this is exactly what the Move implementation of Fernandez considers.

2.14c New: More details on the method used by the ribbon tool are given in Fernandez (2005) and Baumberger (2015).

2.15a Line 38 and Figure 4: Could you provide the analytical formula used to compute the degree of fit?

2.15b The degree of fit was measured manually in map view at the level of the underground facility.

2.16a = Page 8 = Figure 4: what does URL means?

2.16b URL was removed from the figure. It stands for underground rock laboratory.

2.17a = Page 9 = Figure 6: Is the whole workflow two-dimensional like presented in this Figure, and as suggested by the use of Bentley-Ottman algorithm? In this case, specify it.

2.17b The workflow for the probabilistic interpolation is two-dimensional.

2.17c New: For a better description of the system taking into consideration the inherent uncertainty on the extrapolation methods above, we performed a Bayesian inference on the basis of a GTS parallel cross-section (Chapter 3.2. - starting sentence was expanded)

2.18a = Page 13 = Line 11: Unclear if the projection depth is defined for the whole model or for each fault. Is it constant for all faults (i.e. =minimum(fault trace's length, 1000m)) or drawn randomly within a distribution?

2.18b The sentence was rephrased to improve clarity.

2.18c New: The GTS model size is 600x250x100 m, whereas the regional model size was 4x3 km with

a projection depth reaching the underground facility for all faults.

2.19a = Page 14 = Line 8: Why do you make this assumption that faults do not cross at large-scale? Is it common for this geological setting?

2.19b This simplification was chosen, because observed differences in dip values along large-scale (kilometres) faults were small in our study area. Hence we deal here with large-scale faults (> 800 m) that are subparallel to each other at first glance and are projected over not too long distances (400 to 500 m). This implies that crossings of faults along a cross-section subperpendicular to the strike are improbable. However, it remains a suitable assumption and is kind of a simplification. This is different in the short relay structures (bridges) between the large-scale faults. Here crossings definitely occur. Given the unknown spacing and reoccurrence of these relay structures, we cannot make adequate predictions with the chosen approach, a fact, which we clearly state further down in text.

2.20a = Page 15 = Figure 12: Could you highlight incision and exfoliation joints? Resolution is a low.

2.20b Figure was changed accordingly with addition of some highlighted incisions and exfoliation joints.

2.21a = Page 16 = Line 32: Implicit modeling can also be used to extrapolate surface from points, and does not require statistical approximation to represent surface. It could also be used to get the fault geometries. The meaning of these sentences is unclear. See Collon et al., EAGE Paris, 2017 for a short review of Implicit and Explicit modelling (3D Geomodelling in Structurally Complex Areas- Implicit vs. Explicit representations, Collon et al., 2017)

2.21b The end of the sentence was removed as it didn't add information and was not clear.

2.21c New: The deterministic approach was chosen, because we attempted to obtain a geometrically satisfying product within the simplest geological setting possible.

2.22a = Page 17 = Line 3: The definitions of fault thickness is ambiguous (does it mean damage zone or fault core as defined by Torabi et al., 2011). Furthermore, if it can not be used in this case, this short paragraph could be removed.

2.22b We used fault thickness only as the thickness of the fault core.

2.23a = Page 19 = Figure 15: Acronym MAP is not used, and could be mingled with "map"... Remove it for simplicity.

2.23b 'MAP' was removed from the caption in part (b). However, it is kept in part (a) as a box is shown for the dip values obtained for the 'maximum a posteriori' model.

3. Authors response to interactive comments by Gauthier Laurent on "Methods and uncertainty-estimations of 3D structural modelling in crystalline rocks: A case study" by Raphael Schneeberger et al.

*Specific comments*

- 3.1a Try to go to the point in your introduction. Being too general is always risky as it diverts the read from your main point and takes you into topics that are not directly relevant to your point. Namely here, avoid getting into the explicit/implicit modelling swamp land. I don't agree with the way you explain it and I think one should be very meticulous when tackling this topic because it is quite intricate, and at the same time it is not really the topic of your paper. So I would simply skip it.
- 3.1b The introduction was changed based on the reviewer's suggestions
- 3.2a You should reference Cherpeau and Caumon 2015 (10.1144/petgeo2013-030) for the topic of stochastic fault network modelling. It is very similar topic even though the approach is different.
- 3.2b Thank you for the suggestion. The reference was added.
- 3.3a The quality of pictures is not very good. Try to upload pictures with a higher resolution. Most of them are very difficult to read. It might be due to the system and the uploading process. If not, please be careful with the quality of the illustrations.
- 3.3b We checked the images and enhanced the resolution.
- 3.4a page 5, line 15: I disagree with your statement "This study aims at reconstructing the present day 3D geometry and the kinematic evolution is thus of secondary interest." Fault network geometry, topology and kinematics are inter-related and you cannot forget kinematics without willingly missing important information. I understand the kinematics might be quite complex and unresolved in this area, so you might want to consider only current geometry, but you can't suggest that this is just simplifying some details. When you will make decisions about the way faults connect, you will either incorporate kinematics in your reasoning or face the risk to produce models that are kinematically inconsistent.
- 3.4b We agree on the reviewer's statement and the importance of kinematics. In our field area, however, the deformation history was rather complex resulting in different episodes of fault reactivation (Baumberger 2015; Wehrens 2015; Wehrens et al. 2016, 2017; Herwegh et al. 2017). Nowadays it is only possible to unravel the general kinematic history of the region but not to resolve the exact kinematics and displacement history of each individual fault. Sentences were rephrased.
- 3.4c New: This study aims at reconstructing the present day 3D geometry. Although, the kinematic evolution is beyond the scope of this study, the generated models have been validated for kinematic inconsistency with respect to the known tectonic framework (e.g. models with unrealistic dip values have been removed (dip < 60° or north verging)).
- 3.5a fig8: to continue on the remark about kinematics, here you shown different groups of faults, among which B and C, that are presenting horizontal stretching lineations, but there is no trace of any displacement. Do you have an explanation or is it a simplification as well?
- 3.5b The apparent absence of displacement is a matter of resolution. Along faults with nearly horizontal stretching lineations displacements were observed, however the offsets were small (decimetres to few meters). Hence these offsets cannot be displayed at the scale on which we were working on. In contrast to individual large-scale faults in other areas (e.g. San Andreas fault system), we are dealing here with a pervasive fault pattern dissecting the entire Aar massif, from which the study area covers only a very small volume). Over the entire massif, each individual fault has accommodated small displacements only but all together accommodated significant vertical displacements of several kilometres. Further elaborations on the kinematic evolution of the study site can be found in Herwegh et al. 2017 and Wehrens et al. 2017.
- 3.6a It seems to me that you haven't consider the probability that a fault stops before reaching the GTS or that it is branching on another one. In a sense, you are forcing the between the surface and depth observation and might end up with an overestimation of connectivity. Unless I missed something?
- 3.6b This is an excellent point of the reviewer, which were discussing during the writing stage

extensively among us authors. It is true that we forced all surface faults to reach the underground, but please note that only faults longer than 800 m were selected and under the assumption of a circular shape they would reach the underground facility and therefore we think that the simplification that faults go through the entire rock mass to GTS seems feasible. If we would consider greater depths, our assumption would become critical after some depth ranges. Fault continuations at these depth can only be predicted with some confidence for several kilometres long faults, as done in Baumberger 2015.

3.7a page 7 line 37: I am not convinced by the distance misfit. this is not well defined... unless your plans are parallels. Are using the center of the segments? But then, is it relevant, because the location of the center would depend primarily on where the tunnels are located?

3.7b The distance misfit and the angle misfit are dependent on the orientation of the underground facility and the distance misfit is further a function of the spacing. A homogeneous spacing would be required for a comparison between the measured distance misfits. This is not the case, therefore the angle and the distance misfit were not further considered as validation technique of the 3D model.

3.8a Your approach is interesting in the framework of your study, because you have the chance of having both surface and subsurface observations, but your dataset is unique in the sense that we generally don't have such high quality data at depth. Data is generally sparser and less certain. How would your approach be applicable in a more general context? I would suggested to add this discussion to your conclusion.

Similarly, you have the chance that the faults you are considering seem relatively straight at the scale of your study. How could your approach be applied to more general fault networks?

3.8b In terms of general fault networks, our approach can be applied to (i) pervasive regional fault/fracture patterns. Currently it will fail in the case of (ii) discrete large-scale faults (e.g. strike slip faults) consisting of one fault core and associated damage zone. In such cases, more elaborate probabilistic models have to be generated in future, including 3D variations in terms of spacing and orientation of secondary faults and splay faults. For (i) even with few or even missing underground information our approach can be used to predict a surface-based 2D model including a probability evaluation (e.g. variable dip angles) with depth. If available, this evaluation can be tested with individual depth points such as drill core information. Additionally, an expansion towards 3D would require probability attributes for dip azimuths.

#### *Technical comments*

3.9a Page 9, Line 10.

3.9b The constant search window was applied as a first approximation, as the underground facility is nearly horizontal. However, it would be of great interest to apply the Bayesian Inference approach in 3D with the available dataset and use a depth-dependent search window width.

# Methods and uncertainty-estimations of 3D structural modelling in crystalline rocks: A case study

Raphael Schneeberger<sup>1</sup>, Miguel de La Varga<sup>2</sup>, Daniel Egli<sup>1</sup>, Alfons Berger<sup>1</sup>, Florian Kober<sup>3</sup>, Florian Wellmann<sup>2</sup>, & Marco Herwegh<sup>1</sup>

5 <sup>1</sup>Institute for Geological Sciences, University of Bern, Baltzerstrasse 1+3, CH-3012 Bern

<sup>2</sup>Graduate School AICES, RWTH Aachen University, Schinkelstrasse 2, D-52062 Aachen

<sup>3</sup>Nagra, Hardstrasse 73, CH-5430 Wettingen

*Correspondence to:* Raphael Schneeberger (raphael.schneeberger@geo.unibe.ch)

10

15

20

25

30

35

40



**Abstract.** Exhumed basement rocks are often dissected by faults, the latter controlling physical parameters such as rock strength, porosity, or permeability. Knowledge on the three dimensional (3D) geometry of the fault pattern and its continuation with depth is therefore of paramount importance for projects of applied geology (e.g. tunnelling, nuclear waste disposals) in crystalline bedrock. The central Aar massif (Central Switzerland) serves as a study area, where we investigate the 3D geometry of the Alpine fault pattern by means of both surface (fieldwork and remote sensing) and underground ground (mapping of the Grimsel Test Site) information. The fault zone pattern consists of planar steep major faults (kilometre-scale) being interconnected with secondary relay faults (hectometre-scale). Starting with surface data, we present a workflow for structural 3D modelling of the primary faults based on a comparison of three extrapolation approaches based on: a) field data, b) Delaunay triangulation and c) a best fitting moment of inertia analysis. The quality of these surface-data-based-3D models is then tested with respect to the fit of the predictions with the underground appearance of faults. All three extrapolation approaches result in close fit (>10%) when compared with underground rock laboratory mapping. Subsequently, we performed a statistically interpolation based on Bayesian inference in order to validate and further constrain the uncertainty of the extrapolation approaches. This comparison indicates that fieldwork at the surface is key for accurately constraining the geometry of the fault pattern enabling a proper extrapolation of major faults towards depth. Considerable uncertainties, however, persist with respect to smaller-sized secondary structures because of their limited spatial extensions and unknown reoccurrence intervals.

## 1. Introduction

Geological information is inherently three dimensional (3D) in space, but often represented in 2D (Jones et al., 2009). With increasing available computer power, 3D modelling or geometrical visualizations became widespread, as they can be performed on a desktop computer (e.g. Bistacchi et al., 2008; Caumon et al., 2009; Hassen et al., 2016; Sausse et al., 2010; Stephens et al., 2015). 3D models widely serve as basis for subsequent investigations such as stress modelling or fluid flow modelling (e.g. Hassen et al., 2016; Stephens et al., 2015). Explicit structural modelling can further be subdivided into stochastic and deterministic methods. Deterministic approaches yield a single output for input parameters, analogous to drawing a map, (e.g. Stephens et al., 2015), whereas as in stochastic approaches parameters are defined by a probabilistic density function with a component of randomness (e.g. Cherpeau and Caumon, 2015; González-García and Jessell, 2016; Jørgensen et al., 2015; Koike et al., 2015).

When modelling a certain volume of Earth's intermediate deep subsurface (tens of meters to kilometres), as often done for planning nuclear waste repositories, geothermal projects or tunnelling work, 3D structural modelling commonly starts from a known lithological and structural dataset, may it be from the Earth surface or underground facilities such as tunnels or boreholes. Known information is then extrapolated towards the unknown. At the time of extrapolation, its validity cannot be proven unless additional information such as geophysical, borehole or excavation data is integrated.

Previous studies report that this extrapolation represents a main uncertainty within 3D structural modelling of known structures (e.g. Baumberger, 2015; Bistacchi et al., 2008). Whereas from environments with sparse data, for example the topology of the fault network is known to be highly uncertain or the existence of unknown faults (e.g. Cherpeau et al., 2012; Cherpeau and Caumon, 2015; Hollund et al., 2002).

More generally, for kilometre-scale models uncertainties in accuracy related to input data (i.e. GPS location, dip / dip azimuth measurements) are small compared to the uncertainty related to the data interpolation between known locations or to data extrapolation (Bond, 2015).

Uncertainties play an important role when considering decision-making based on information available from a 3D model and have therefore been subject to extensive studies in the past (e.g. Bistacchi et al., 2008; Bond et al., 2007b; Lindsay et al., 2012; Tacher et al., 2006; Wellmann et al., 2010, 2014; Wellmann and Regenauer-Lieb, 2012; Yamamoto et al., 2014).

Raphael Schneeberger 14.8.2017 08:29

**Gelöscht:** < 6% distance misfit

Raphael Schneeberger 4.8.2017 09:25

**Gelöscht:** Two different approaches are mainly used for modelling 3D geological problems: explicit modelling or implicit modelling. An implicit model is built by an interpolation function defining a solid throughout space. In contrast, an explicit model uses a patchwork of 3D meshes formed by interconnected triangles (Cowan et al., 2003). Implicit modelling allows for faster re-calculation of the model and thus faster model updating with new data (Lindsay et al., 2012). Explicit modelling, however, allows for easier visualization

Raphael Schneeberger 4.8.2017 09:25

**Gelöscht:** s

Raphael Schneeberger 16.8.2017 13:58

**Gelöscht:** models

Raphael Schneeberger 4.8.2017 10:29

**Gelöscht:** try to represent the actual occurrence of geological features

Raphael Schneeberger 4.8.2017 10:29

**Gelöscht:** producing a single output

Raphael Schneeberger 4.8.2017 10:39

**Formatiert:** Hervorhebung

Raphael Schneeberger 4.8.2017 10:39

**Formatiert:** Hervorhebung

Raphael Schneeberger 16.8.2017 12:27

**Gelöscht:** Therefore, the therout derived mathematical instances are also probabilistic distributions (e.g. González-García and Jessell, 2016; Jørgensen et al., 2015; Koike et al., 2015).

Raphael Schneeberger 4.8.2017 08:56

**Gelöscht:** the

Raphael Schneeberger 14.8.2017 16:48

**Gelöscht:** (e.g. Baumberger, 2015; Bistacchi et al., 2008).

Since models are a function of the used data, some of the approaches tend to analyse uncertainties of the input data before modelling (e.g. Bond et al., 2007a; Jones et al., 2009). Other approaches investigate the error propagation into the models inferring the uncertainty after modelling (Jessell et al., 2010; Lindsay et al., 2012; Viard et al., 2011; Wellmann et al., 2010). Most of these published studies were performed within sedimentary environments where parameters, such as stratigraphy, layer thickness, layer orientation, and structural setting are well constrained. Uncertainty estimation and its potential reduction are less well constrained for structural modelling of basement rocks (e.g. Svensk Kärnbränslehantering AB, 2009), which are characterized by intrusive contacts and a complex arrangements of deformation structures.

In this study, we focus on deformed basement rocks and the extrapolation of faults to depth. We follow two main goals: (i) application of an extrapolation workflow for three different techniques for projection of surface structures to depth considering associated projection uncertainties, and (ii) design and application of a probabilistic approach to compare different extrapolation techniques in order to validate the generated models.

We focus specifically on the combination of observations in outcrops at the surface with observations in an underground facility allowing for an extrapolation modelling approach and propose that it is possible to link these two types of observations in a probabilistic context, taking into account uncertainties in measurements, as well as the exact tie between observed features at the surface and in the underground facility. We investigate a local case study in a relatively simple setting in crystalline rocks. The study area is characterized by well-exposed crystalline rocks of the Aar massif in the Central Swiss Alps (Fig. 1) and furthermore greatly benefits from subsurface information from the Grimsel Test Site (GTS) underground rock laboratory run by the Swiss Cooperative for Disposal of Radioactive Waste (Nagra).

This combination of good outcrop conditions at the surface and independent high quality subsurface information allows for an extrapolation modelling approach and subsequent validation in a relatively simple and well-constrained high-topography crystalline setting.

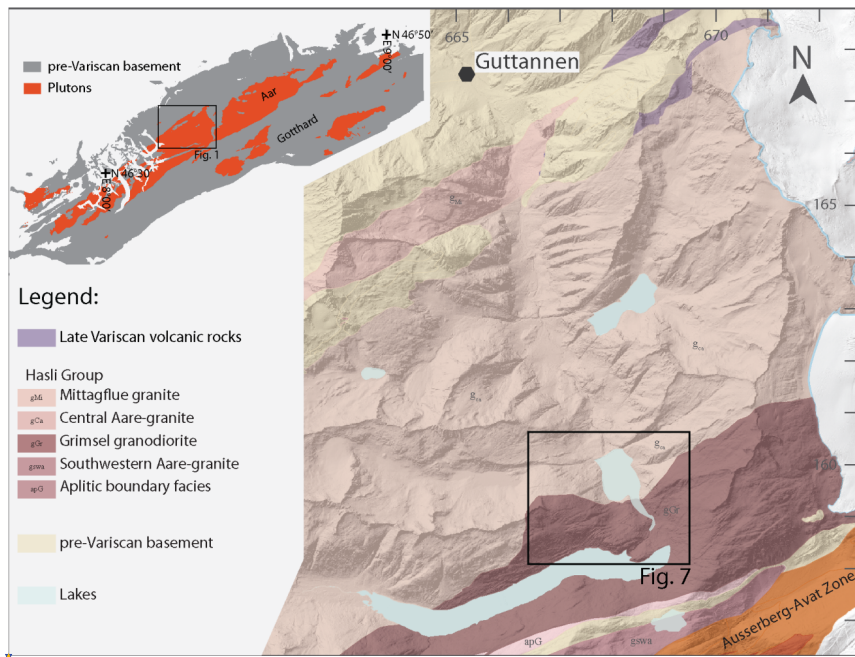

- Raphael Schneeberger 4.8.2017 08:57  
**Gelöscht:** information
- Raphael Schneeberger 4.8.2017 08:58  
**Gelöscht:** is known and the overall tectonic setting is rather simple
- Raphael Schneeberger 4.8.2017 08:58  
**Gelöscht:** three
- Raphael Schneeberger 4.8.2017 08:59  
**Gelöscht:** Development
- Raphael Schneeberger 4.8.2017 08:59  
**Gelöscht:** ii) estimation of related uncertainties using underground information,
- Raphael Schneeberger 4.8.2017 08:59  
**Gelöscht:** i

Raphael Schneeberger 4.8.2017 09:00  
**[1] nach unten verschoben: 2. Geological setting .**

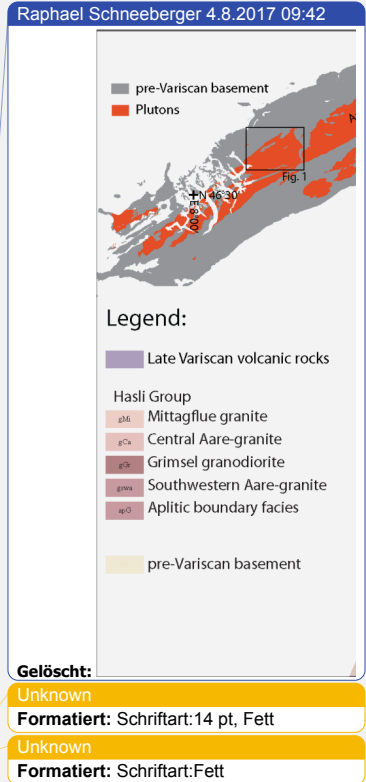

- Gelöscht:** Unknown
- Formatiert:** Schriftart:14 pt, Fett
- Gelöscht:** Unknown
- Formatiert:** Schriftart:Fett

## 2. Geological setting

The study site is located in the Haslital in the Central Alps (Switzerland, Fig. 1) within the Aar massif, an External Crystalline Massif of the Alps, representing exhumed basement rocks of the former European continental margin and thus belonging to the paleogeographic Helvetic domain of the Alps (e.g. Mercolli and Oberhänsli, 1988; Pfiffner, 2009; von Raumer et al., 2009).

Three different host rocks of magmatic origin occur in the study area: (i) Grimsel granodiorite (GrGr), (ii) Central Aar granite (CAGr), and (iii) meta-basic dykes (e.g. Abrecht, 1994; Keusen et al., 1989; Labhart, 1977; Stalder, 1964). The GrGr and the CAGr belong to the Haslital group, which is a Permian calc-alkaline magmatic differentiation suite (Berger et al., 2017; Schaltegger, 1990; Schaltegger and Corfu, 1992), the GrGr being the more primitive member. The two host rocks mainly differ in the relative amount of biotite, with ca. 11 vol% biotite in the GrGr compared to ca. 5 vol% biotite in the CAGr (Keusen et al., 1989). Intermingling structures observed in the field indicate coeval viscous state (Schneeberger et al., 2016). Furthermore, the concordant zircon and titanite U/Pb intrusion ages of both rock units are overlapping within error, where the GrGr intrusion has a concordant titanite U/Pb intrusion age of  $299 \pm 2$  Ma and the CAGr an age of  $299 \pm 2$  Ma (Schaltegger and Corfu, 1992). The granitoids intruded during Late to Post-Variscan extensional tectonics into a polymetamorphic pre-Variscan basement (Abrecht, 1994; Berger et al., 2017; Labhart, 1977; von Raumer et al., 2009; Schaltegger, 1990, 1994).

Meta-basic dykes, formerly called lamprophyres (Oberhänsli, 1986), intrude into the granitoid bedrock without altering the granitoid indicating only slightly younger intrusion ages of former basic dykes with respect to the calc-alkaline granitoids.

Aforementioned rock types are subsequently overprinted by metamorphism and deformation related to Alpine orogeny. Peak metamorphic conditions reached  $450 \pm 30$  °C and  $6 \pm 1$  kbar (Challandes et al., 2008) at 22 - 20 Ma (Challandes et al., 2008; Rolland et al., 2009).

Several authors have described the deformation related to Alpine orogeny in the vicinity of the study area (e.g. Baumberger, 2015; Challandes et al., 2008; Choukroune and Gapais, 1983; Goncalves et al., 2012; Keusen et al., 1989; Marquer et al., 1985; Rolland et al., 2009; Steck, 1968; Wehrens et al., 2016, 2017). Ductile deformation is expressed by a pervasive foliation and by localized high strain zones (shear zones). The exact geometry of the 3D shear zone network, which occurs at a variety of scales ranging from several kilometres down to millimetres, is complex (Choukroune and Gapais, 1983). It is, however, possible to extract a pattern of km-long major shear zones interconnected by hectometre-long subordinate bridging structures. The major shear zones tend to be quasi-planar (Baumberger, 2015; Wehrens et al., 2017) and we therefore assume a considerably simplified shear zone pattern with quasi-planar to planar geometries of the major shear zones grouped according to their strike orientation (Fig. 2).

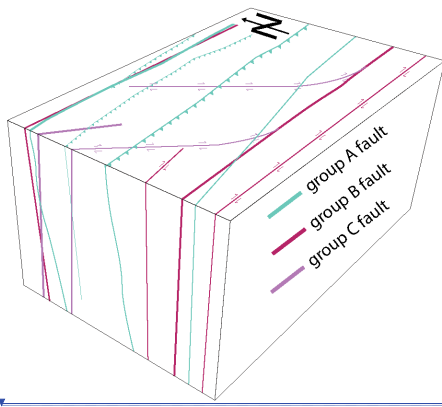

Figure 2. Schematic bloc diagram showing geometrical relationships between faults of different orientation groups (modified after Wehrens et al. 2017).

The kinematic framework of Alpine deformation is controversial. Several kinematic models have been proposed for the shear zone network genesis in the study area, including single phase (Choukroune and Gapais, 1983) and multistage evolution models (Herwegh et al., 2017; Rolland et al., 2009; Steck, 1968; Wehrens et al., 2016, 2017). This study aims at reconstructing the present day 3D geometry. Although the kinematic evolution is beyond the scope of this study, the generated models have been validated for kinematic inconsistency with respect to the known tectonic framework (e.g. models with unrealistic dip values have been removed (dip < 60° or north verging)). The different orientations of the structures are therefore used without kinematic implications. Major orientation of structures within the area are NE-SW (group A), E-W (group B) and NW-SE (group C) trending (Schneeberger et al., 2016; Wehrens et al., 2017).

The pervasive foliation and the highly localized shear zones form mechanical anisotropies, which favour subsequent brittle localization (Belgrano et al., 2016; Kralik et al., 1992). Deformation in the brittle regime is expressed by fracturing and cataclasis, often resulting in fault gouges (Bense et al., 2014; Wehrens et al., 2016). The spatial distribution of fractures as well as their reactivation in the form of fault gouge development is heterogeneous (Bossart and Mazurek, 1991; Mazurek, 2000).

Although the shear zones experienced a severe ductile deformation history, most of them were reactivated in brittle manner during the exhumation history (Wehrens et al., 2017). Subsequently, we therefore use the term fault as summary terms for high T ductile shear zones, low T ductile shear zones and their reactivation by brittle shearing leading to cohesive (protocataclasite, cataclasite) or non-cohesive (fault gouge) fault rocks.

Present day seismic activity (Pfiffner and Deichmann, 2014) indicate on-going recent tectonic activity in the deep subsurface of the Aar massif.

Glaciation and glacial retreat contributed to the latest history of the area (Wirsig et al., 2016). Basal erosion and the latest young (17.7 ka, Wirsig et al. 2016) retreat ages produced excellent outcrop conditions, as most outcrops are glacially polished and above the treeline, exposing bare bedrock.

Owing to deglaciation, exfoliation jointing occurred (Ziegler et al., 2013). Given the restricted near-surface occurrence of these exfoliation joints and their small dimensions, we exclude these deformation features from further consideration in this study.

Raphael Schneeberger 4.8.2017 09:36

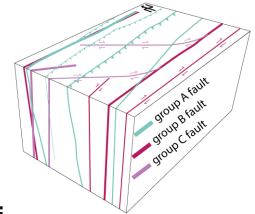

Gelöscht:

Raphael Schneeberger 4.8.2017 09:01

Gelöscht: and the kinematic evolution is thus of secondary interest.

### 3. Methods

#### 3.1. Extrapolation workflow

In order to represent the 3D geometry of faults, we developed a workflow based on a combination of remote sensing and fieldwork (Fig. 3).

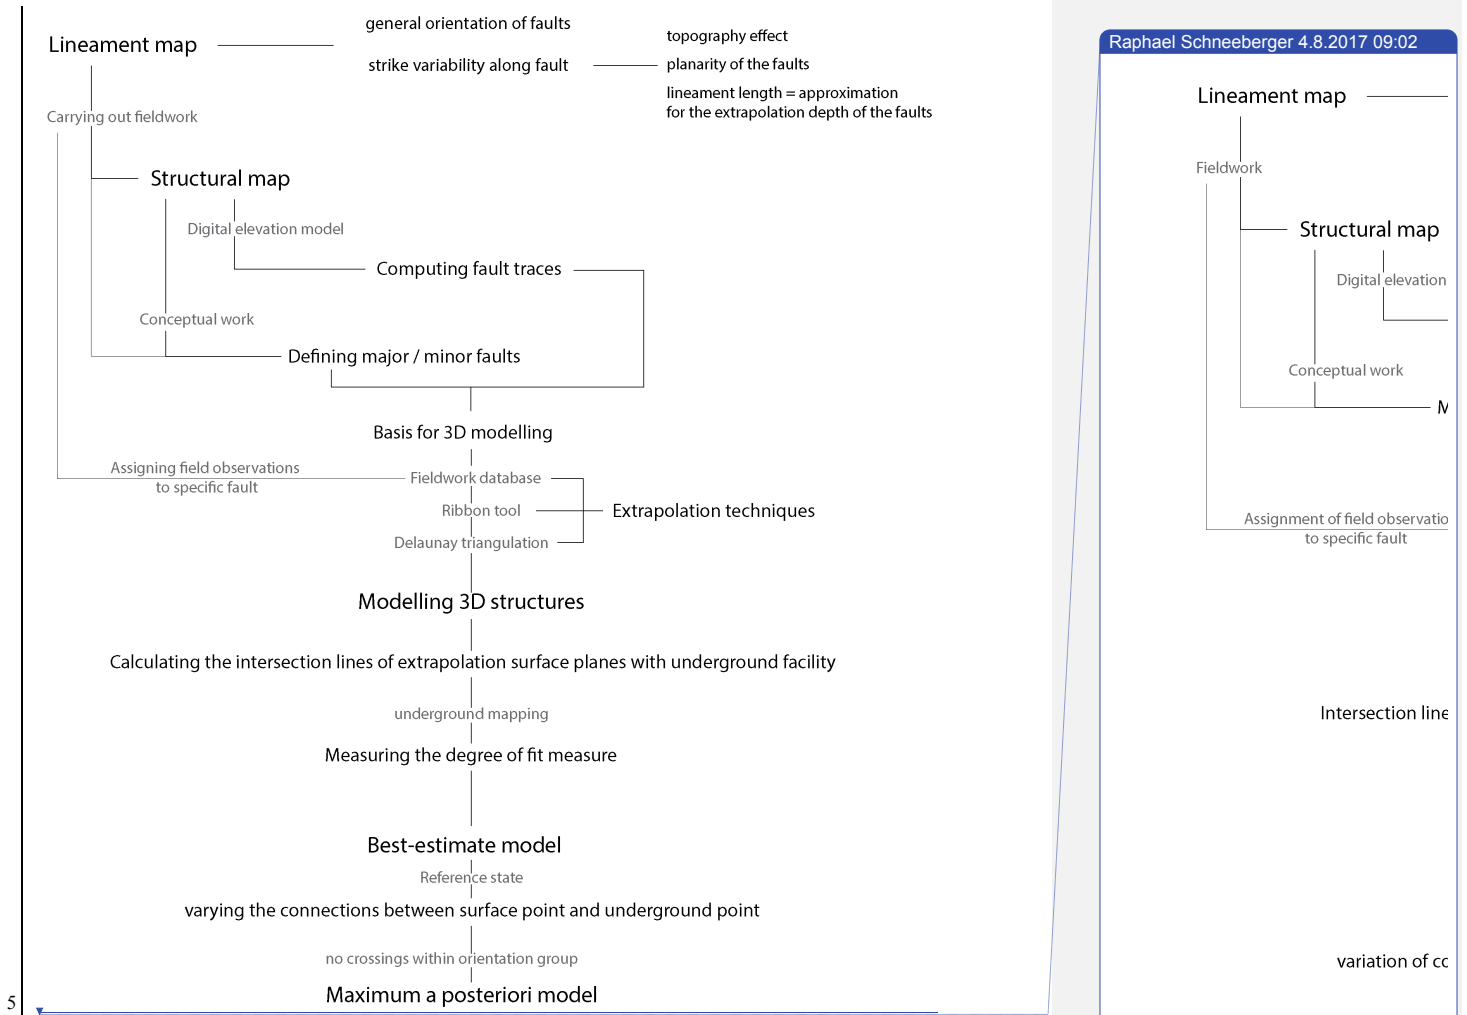

**Figure 3. Employed modelling workflow to generate a 3D structural model of the area based on a surface lineament map. As a major step, the workflow also considers the uncertainty related to connection between mapped faults at surface and in the underground.**

As a first step, we generated a lineament map using remote sensing data. We use the term lineament as defined by Gabrielsen et al. (2014) and O’Leary et al. (1976), where a lineament is a mappable linear or curvilinear feature identified by remote sensing, possibly representing the intersection between a planar to subplanar structural anisotropy and the Earth surface. Lineament mapping followed the methodology presented by Baumberger (2015). Aerial photographs (Swisstopo) and digital elevation model (DEM; Swisstopo) with resolutions of 0.5 m and 2 m, respectively, served as basis.

Raphael Schneeberger 4.8.2017 09:02

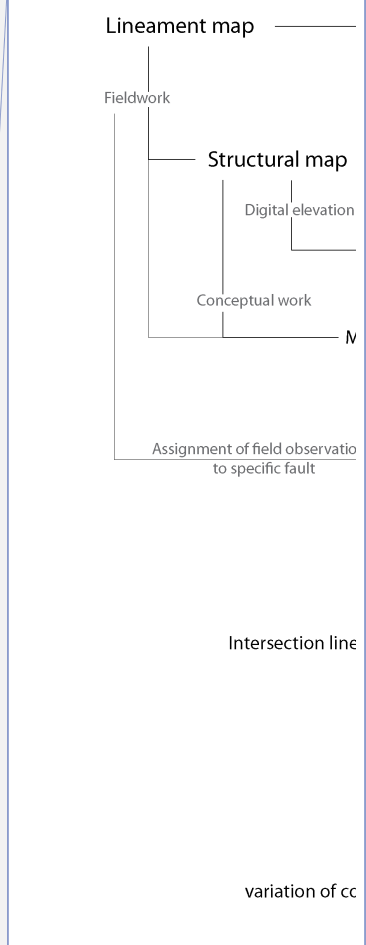

Gelöscht:

Raphael Schneeberger 4.8.2017 09:02

Gelöscht: Modelling workflow



Using the DEM, hillshade images (i.e. greyscale relief images) with distinct illumination angles (0°-360° illumination azimuth with 45° steps and constant at 30° altitude angle) were calculated, resulting in eight hillshade images, illuminating different areas of the investigation area. On a pixel-based map, the possible strike angle of a line depends on the number of pixels of the raster matrix in which the line is enclosed (Heilbronner and Barrett, 2014). Our approach requires an angular resolution <math><10^\circ</math>, thus a minimum length of 10 pixels for a specific lineament was necessary to fulfil this criterion. Hence, shorter lineaments (<math><5\text{ m}</math>) were discarded. Lineaments were manually digitized and are composed of minimum 2 endpoints and potentially several points in between.

The strike of lineaments was defined as the angle measured clockwise from north. Two different approaches to analyse the strike of lineaments were compared: (i) single strike values from endpoint to endpoint, and (ii) strike values for individual segments between a lineament's nodes. In both approaches, a weight is added to the strike proportional to the length of the lineament.

In addition to the aforementioned remote sensing approach, conventional structural surface mapping over an area of 13 km<sup>2</sup> was performed. Spatially restricted outcrop observations at the surface were extrapolated along strike using the lineament map, thus combining fieldwork and remote sensing allowed obtaining a structural surface map. Ductile deformation was mapped differentiating pervasive background strain and localized high strain zones (shear zones). At the surface, mapping of brittle deformation focused on the occurrence of fault gouges. In addition, mapping in the GTS underground facility was performed similarly to surface mapping on dm-scale and in more detail regarding brittle structures (Schneeberger et al., 2016).

Structural modelling was performed using Move<sup>TM</sup> software (Midland Valley) on two distinct scales: at a local (decametre) scale for the GTS and at a regional scale (km-scale) for the entire study area. Underground 3D structural modelling was performed on the basis of underground mapping and drill core data, which resulted in fault traces and orientations. This information provided the base for the 3D reconstruction of fault planes. Regional 3D structural modelling was performed following published workflows using the surface fault map as a basis (e.g. Baumberger, 2015; Bistacchi et al., 2008; Kaufmann and Martin, 2009; Zanchi et al., 2009). Surface faults were extrapolated to depth by assigning a dip value to individual surface traces, where a trace is the intersection between the Earth's surface and a fault. Three different extrapolation approaches were applied: (i) extrapolation along measured dip and dip azimuth (fieldwork-based approach). Data from outcrops were considered within an orthogonal distance of <math><20\text{ m}</math> to inferred fault traces and a strike differing less than 20° compared to the fault's mean strike as defined by remote sensing. The fault's mean strike was calculated via linear regression through all points defining its trace. (ii) Delaunay triangulation is a meshing algorithm that produces a triangulation for several points such that no point of the point cloud is inside the circumcircle of any triangle connecting three points of the point cloud (Delaunay, 1934). It results in a 3D surface interpolating the selected points. Based on this surface, the entire fault trace can be extrapolated. Noise can arise because of rugosities of the fault planes, uncertainties of tracing the fault intersection at the surface, and too low vertical variations in topography. In the case of near planar faults, the noise is reduced in the case of high variations in altitude between valleys and mountain peaks as well as by preferring projections of long fault traces over those of short fault segments. (iii) The ribbon tool is a Move<sup>TM</sup> internal interpolation algorithm based on a three points approach, where three points form a triangle and the orientation is averaged over a defined number of triangles (Midland Valley). The maximum dip orientation of each average triangle is represented as a stick at the location of the starting point. Combination of all sticks along a trace results in a plane for the given trace. More details on the method used by the ribbon tool are given in Fernandez (2005) and Baumberger (2015).

For each approach, the surface fault trace was extrapolated to depth using the obtained specific orientation. Subsequently, the intersection line between the extrapolated plane and a horizontal plane at GTS elevation (approx. 1730 m a.s.l.) was calculated. Then, the resulting intersection lines were compared with the underground structural map in order to find the 'best fitting' underground structure to the obtained intersection line. The degree of fit between the intersection line at the

Raphael Schneeberger 14.8.2017 08:38

Gelöscht: 3D

Raphael Schneeberger 4.8.2017 09:03

Gelöscht: , where triangulation

Raphael Schneeberger 4.8.2017 09:04

Gelöscht: is calculated such as

surface and the trace of the underground structure was estimated using the orthogonal distance (distance misfit), starting from the intersection with the main gallery, and the angular difference (angle misfit) between the two linear features (Fig. 4).

Only structures within [the same](#) orientation group (group A, B, C) were compared.

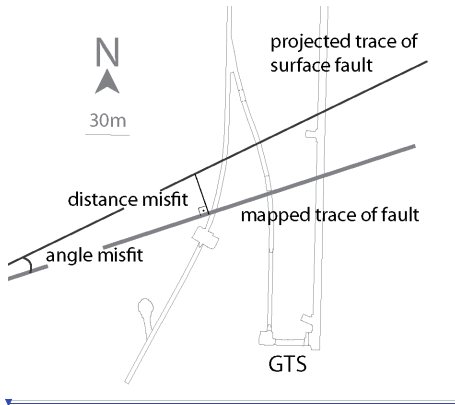

5 **Figure 4. Schematic drawing of hypothetical example for validation of 3D models based on angular and distance misfit (map view). The contours of the GTS are shown in grey with a mapped fault trace and a fault trace resulting from projection of the fault plane from the surface.**

Furthermore, the degree of fit was compared between the different extrapolation approaches and thus for every surface fault. Considering all approaches, a 'best fitting' underground fault was assigned based on the aforementioned criteria. This assignment served as basis for the following structural modelling step, where every surface fault was linearly interpolated with the assigned 'best fitting' underground fault, yielding a 'best estimate' model.

### 3.2. Bayesian Inference

For a better description of the system taking into consideration the inherent uncertainty on the extrapolation methods above, we performed a Bayesian inference [on the basis of a GTS parallel cross-section](#). Bayes' theorem

$$p(\theta | y) = \frac{p(\theta)p(y|\theta)}{p(y)}$$

15 provides a formal way to update probability distributions for model parameters  $\theta$  when new data  $y$  is obtained. The final goal is to obtain the posterior distribution  $p(\theta | y)$  of the parameters  $\theta$ , given the observations  $y$ . This distribution is proportional to the distribution of prior parameters  $p(\theta)$ , and likelihood functions,  $p(y|\theta)$  which determine how likely these parameters are, given specific observations  $y$ . The term  $p(y)$  is a normalisation constant and commonly referred to as evidence or marginal likelihood (see for example MacKay, 2003, for more details).

Raphael Schneeberger 4.8.2017 09:05

Gelöscht: an

Raphael Schneeberger 4.8.2017 09:45

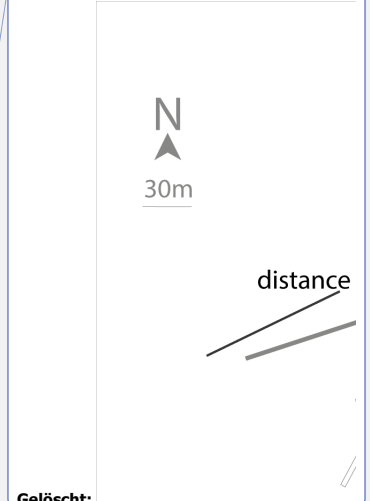

Gelöscht:

Raphael Schneeberger 14.8.2017 08:32

Gelöscht: Schematic drawing of hypothetical example for validation of 3D models based on angular and distance misfit.

Raphael Schneeberger 4.8.2017 09:05

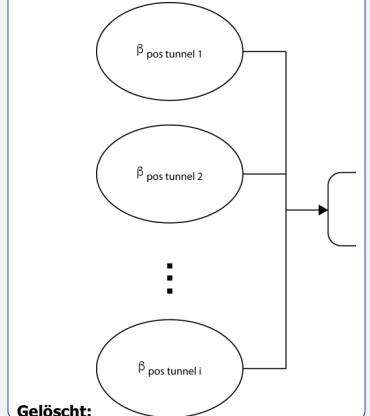

Gelöscht:

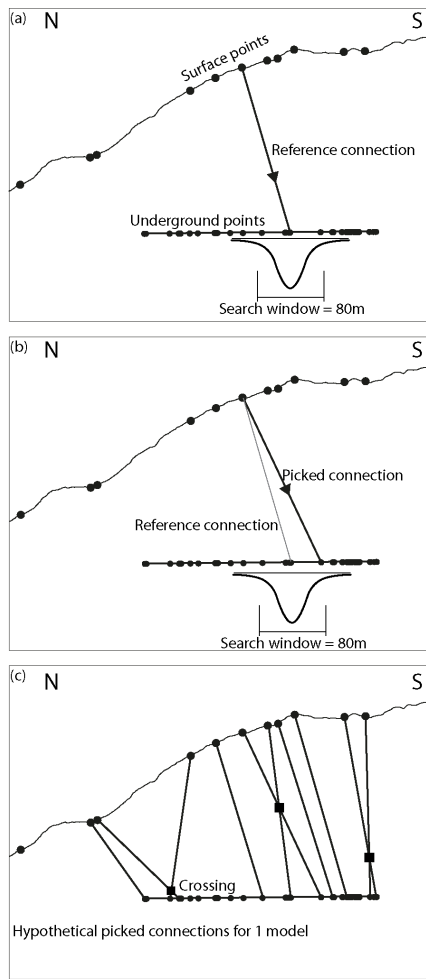

Figure 5. Schematic cross-section illustrating the statistical modelling methodology for one example. (a) Reference state is defined by aforementioned workflow. A search window of 80 m is assigned to the reference underground point. (b) The code picks a possible underground point within the 80 m search window based on a normal Gaussian distribution and calculates the connection. (c) For every surface point one underground point is picked and connected by a projection line (hypothetical fault plane). By connecting each surface point with one underground point a connection pattern results. Ten thousand runs were now performed, each connecting different surface and underground points. The 10'000 connection patterns are compared with each other, and evaluated by a penalty criterion. This penalty criterion addresses the number of fault plane crossings and rates solutions with lowest number of fault plane crossings highest, yielding in a probability for connecting a specific surface point to a certain underground point.

In this study's scenario, we assign a parameter to each surface fault at the tunnel level. We represented the uncertainty about the exact value with a Gaussian distribution and a constant standard deviation of 40 m in the horizontal axis (Fig. 5), based on the dip uncertainty of 10° based on the dip variation in multiple orientation measurements along a single fault (Fig. 5). As a mean value, we assign the 'best estimate' model from the previous interpolation. Interpolated planes were grouped according to their orientation into three separate groups (identified by A, B, C in the following, Fig. 2).

Within each orientation group, we expect faults to be mostly parallel with limited intersections based on field observations. To capture this idea, we assigned a penalty factor that reduces the log-likelihood of a parameter set for an increasing number

Raphael Schneeberger 4.8.2017 09:06  
 Gelösch: Figure 5. Bayesian inference network scheme -

Raphael Schneeberger 4.8.2017 09:06  
 Gelösch: 6

Raphael Schneeberger 14.8.2017 08:34  
 Gelösch: For every surface point a corresponding underground point is picked resulting in a connection pattern. This pattern building is performed 10'000 times and all patterns are compared based on the number of crossings within the specific pattern, yielding in a probability for connecting a certain surface point to a certain underground point -

Raphael Schneeberger 4.8.2017 09:06  
 Gelösch: 6

Raphael Schneeberger 4.8.2017 09:06  
 Gelösch: 6

of intersections (by 0.05 per intersection, to be precise). The number of intersections per iteration was calculated using the Bentley-Ottmann algorithm (Supplement; Balaban, 1995; Bentley and Ottmann, 1979).

The described Bayesian inference cannot be performed directly due to the complexity of multiple parameters in several groups and the non-linearities due to the fault intersections. We therefore apply a computational sampling method based on an Adaptive Metropolis MCMC approach (Haario et al., 2001) implemented in the probabilistic programming package PyMC 2 (Patil et al., 2010), and successfully used in a geological context before (de la Varga and Wellmann, 2016).

Final posteriors were discretized to match the locations of measured faults in the underground tunnel by a simple nearest location classifier (Fig. 5). Therefore, the final result of the inference is a discretised distribution of each of the parameters. In order to compare the 3D models obtained by the three extrapolations approaches, we then use the maximum a posteriori value, i.e. the highest probability value of the posterior distributions.

## 4. Results

### 4.1 Lineament map

In total, 5277 lineaments with a spatially heterogeneous distribution and lengths ranging from 5 m to 1941 m were mapped (Fig. 6a). Lineaments are generally more concentrated along topographic highs and lows. Within certain areas (areas (i) and (ii) in Fig. 6a), the lineament's strike tends to be parallel to the dip azimuth of the slopes yielding uniform orientations. In contrast, in domains with relatively low topographic variations a variety of strike orientations become discernible (area (iii) in Fig. 6a).

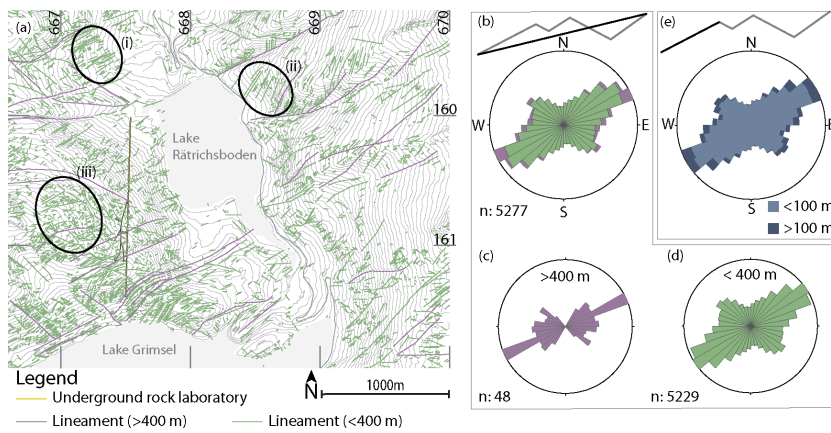

**Figure 6.** (a) Lineament map of the study area with underground rock laboratory. Topography contours are based on SwissAlti3D (reproduced by permission of swisstopo (BA17063)). (b-d) Length-weighted rose diagrams showing endpoint to endpoint strike of all lineaments (b), of lineaments longer than 400m (c) and of lineaments shorter than 400m (d). (e) Length-weighted rose diagram showing the orientation of each segment of all lineaments.

Looking at the bulk data, lineaments show a major NE-SW and a minor NW-SE trend (Fig. 6b). Long lineaments (>400 m) are mainly oriented NE-SW (Fig. 6c), whereas short lineaments show a considerable variation in strike (Fig. 6d). The two methods for estimating lineament orientations, endpoint to endpoint (Fig. 6b) and individual segments (Fig. 6e), yield similar results.

Raphael Schneeberger 16.8.2017 14:03  
Gelösch: .

Raphael Schneeberger 4.8.2017 09:06  
Gelösch: 6

Raphael Schneeberger 4.8.2017 09:06  
Gelösch: 7a

Raphael Schneeberger 4.8.2017 09:06  
Gelösch: 7a

Raphael Schneeberger 4.8.2017 09:06  
Gelösch: 7a

Raphael Schneeberger 4.8.2017 09:47

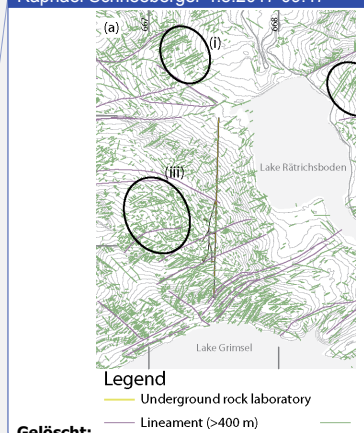

Gelösch: Unknown  
Formatiert: Schriftart:Fett, Schriftfarbe: Text 1

Raphael Schneeberger 4.8.2017 09:06  
Gelösch: 7

Raphael Schneeberger 4.8.2017 09:06  
Gelösch: 7b

Raphael Schneeberger 4.8.2017 09:06  
Gelösch: 7c

Raphael Schneeberger 4.8.2017 09:06  
Gelösch: 7d

Raphael Schneeberger 4.8.2017 09:12  
Gelösch: When comparing the two different approaches for strike measurement, the calculated strike distributions are comparable (Figs. 7b and e).

## 4.2 Field observations and data

Data obtained by fieldwork combined with a compilation of several published maps (Baumberger, 2015; Keusen et al., 1989; Vouillomaz, 2009; Wehrens et al., 2017; Wicki, 2011) yielded a surface fault map (Fig. 7, see also Schneeberger et al., 2016).

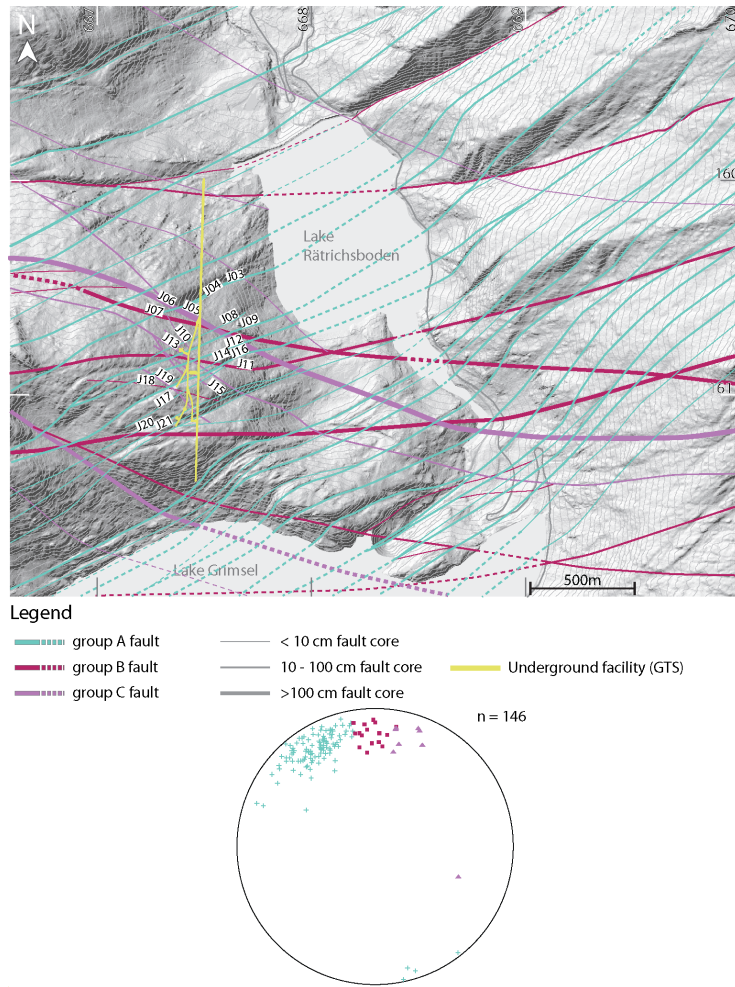

**Figure 7.** Surface fault map with faults grouped by strike orientation (group A, B, C). Hillshade image underlying the map is based on SwissAlti3D (reproduced by permission of swisstopo (BA17063)). Fault exposure lines are dashed over uncertain areas and are labelled in cases where a connection to GTS exists. Lower hemisphere equal area projection with planes poles grouped according to strike. Map is based on Swiss coordinate system.

Based on their orientation, we discriminated different groups of faults (Fig. 7): group A are mainly steep SE-dipping faults. Their average orientation (dip azimuth / dip) is 149/74. Group A faults mostly show steeply plunging stretching-lineations resulting from ductile shearing. Group A can be correlated with faults formed during the Handegg phase (22 – 17 Ma) as defined by Wehrens et al. (2017) while group B and group C would correspond to faults formed during the Oberaar phase (14 – 12 Ma, Wehrens et al., 2017). Group B are mainly steep S-dipping (mean orientation: 178/72) faults. Lastly, group C are SW-dipping faults coeval with group B, with an average orientation of 196/72. Group C faults are subparallel to meta-

Raphael Schneeberger 4.8.2017 09:07  
Gelösch: 8

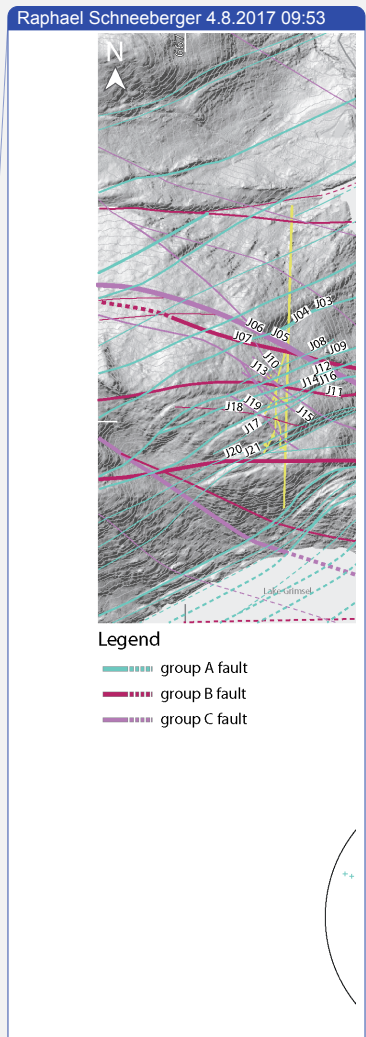

Raphael Schneeberger 4.8.2017 09:53  
Gelösch: 8  
Unknown  
Formatiert: Schriftart:Fett, Schriftfarbe: Text 1  
Raphael Schneeberger 4.8.2017 09:07  
Gelösch: 8  
Raphael Schneeberger 4.8.2017 09:07  
Gelösch: 8



basic dykes and often co-occur spatially with the latter. Group B and C mostly show oblique to horizontal stretching-lineations. For multiple orientation measurements along individual faults the standard deviation of the mean dip azimuth was below 15° and of the mean dip below 10°. Generally, the GrGr dominated southern area shows an increased number of faults (Figs 7 and 8). Detailed underground mapping resulted in a lithological (Fig. 8a) and in a structural map of the GTS (Fig. 8b).

5

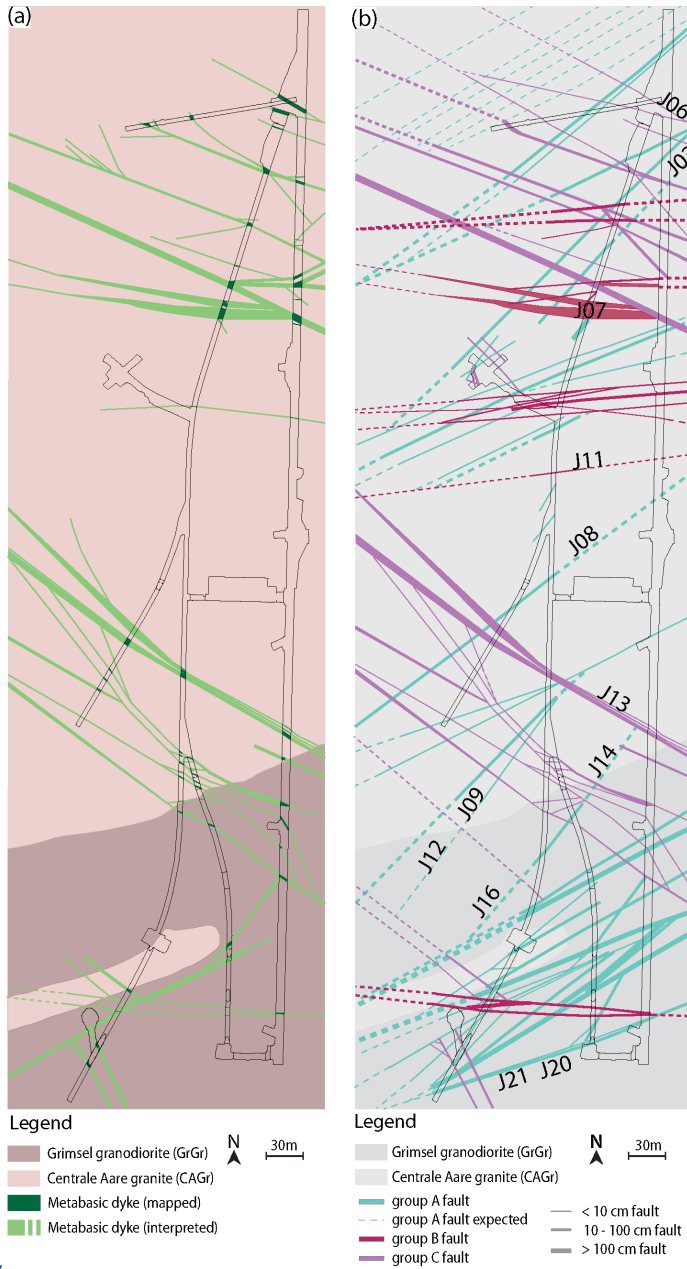

- Raphael Schneeberger 4.8.2017 09:07
- Gelöscht:** 8
- Raphael Schneeberger 4.8.2017 09:07
- Gelöscht:** 9
- Raphael Schneeberger 4.8.2017 09:07
- Gelöscht:** 9a
- Raphael Schneeberger 4.8.2017 09:07
- Gelöscht:** 9b
- Raphael Schneeberger 4.8.2017 09:57

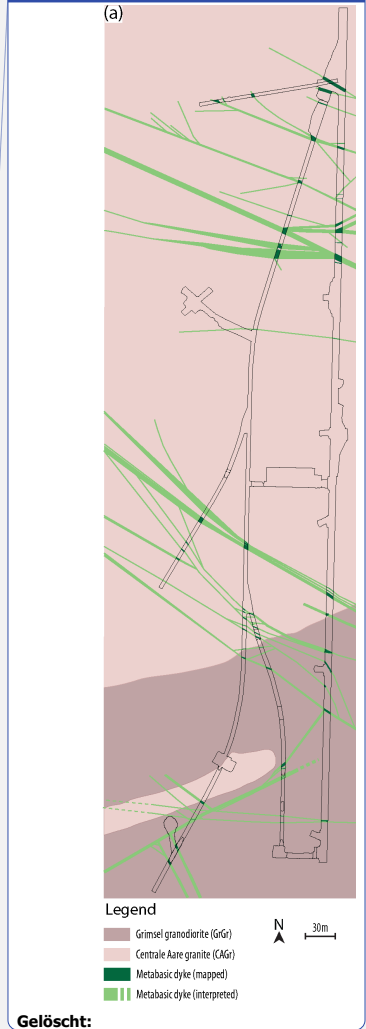

Figure 8. (a) Petrographic underground map. (b) Structural mapping (1:1000) of the underground rock laboratory (GTS) with faults grouped according to their strike. Indicated labels correspond to surface fault labelling and represent 'maximum a posteriori' interpolation.

Meta-basic dykes occur as three distinct swarms, two being located within the CAGr domain (Fig. 8a). The northern two swarms strike NW-SE, whereas the southern swarm strikes E-W, however, less clearly marked. Numerous dykes are overprinted by an Alpine foliation, which sometimes is oblique to the dyke boundary. Furthermore, dykes are often overprinted by localized ductile as well as brittle deformation, expressed by shear zones and fault gouges.

Faults occur along three NE-SW trending swarms, two E-W trending swarms and along two NW-SE trending swarms, leading to a heterogeneous strain distribution along the underground facility (Fig. 8b).

The NE-SW trending swarms correspond to group A faults with an average spacing of ca. 16 m. In total, 31 group A faults were mapped in the underground. They can be further subdivided into 17 moderately to steeply dipping faults (between 45 and 75°) and 14 sub-vertically dipping ones (>80°).

The E-W trending swarms correspond to faults with orientations that are similar to group B. In total, 12 of these E-W striking faults were mapped.

The NW-SE trending fault swarms are localized mainly along dykes (Fig. 8) and represent group C structures. In total, 25 NW-SE striking faults occur within GTS.

Faults in the CAGr (northern part) seem to preferentially localize along pre-existing anisotropies, i.e. high-temperature brittle fractures (biotite coating) or meta-basic dykes and thus form discrete faults (cm-sized) with marked contacts to the host rock. In contrast, faults in the GrGr dominated southern part form strain gradients over larger distances (m-sized). This observation is in agreement with findings of Wehrens et al. (2017).

### 4.3 3D structural modelling

The GTS model size is 600x250x100 m, whereas the regional model size was 4x3 km with a projection depth reaching the underground facility for all faults. The projection depth was defined arbitrarily, but no larger than half of the fault trace's length. All 3D models are provided as supplementary material.

#### 4.3.1 GTS model

Combination of the above-presented underground map with measured surface orientation data resulted in a 3D geometric visualization of meta-basic dykes and faults mapped in the underground. Swarms of meta-basic dykes tend to join towards less numerous dykes with depth. Based on geometrical considerations, we infer the occurrence of three major dykes from which all others either fan out or form relay structures in-between the major dykes. Based on the field observation that the major faults and relay structures dip steeply to sub-vertically towards the south, we discriminated 8 major group A faults and 23 relay structures. Major group A faults occur within each NE-SW trending swarm discriminated on map view. Group B deformation structures can be further subdivided into 6 major and 7 relay faults. Group C deformation structures can be subdivided into 6 major and 32 relay deformation structures, some of which are very short (14 m).

#### 4.3.2. Regional model

The surface fault map (Fig. 7) served as a basis for the generation of the three different km-scale 3D models (see above). All three modelling approaches yielded the 3D geometrical visualization of the surface fault pattern. They all share the same fault traces at the model surface. As mentioned above, projection specific dip values were used for each of the models. However, not all surface faults were extrapolated with each approach. Of the 21 possible surface faults, 10 were extrapolated with the fieldwork-based approach, 11 using the Delaunay triangulation and 13 with the ribbon tool method. Missing projections can be due to lack of outcrop description or absence of sufficient topographic relief for remote sensing based approaches.

By combining all three approaches at least one, but up to three degrees of fit with underground faults were calculated for each surface fault. Based on the different degrees of fit a 'best fitting' underground structure was assigned to each surface

Raphael Schneeberger 4.8.2017 09:07  
Gelösch: 9

Raphael Schneeberger 4.8.2017 09:07  
Gelösch: 9a

Raphael Schneeberger 4.8.2017 09:07  
Gelösch: 9b

Raphael Schneeberger 4.8.2017 09:07  
Gelösch: 9

Raphael Schneeberger 14.8.2017 08:52  
Gelösch:

Raphael Schneeberger 4.8.2017 09:13  
Gelösch: of 1000 m

Raphael Schneeberger 4.8.2017 09:07  
Gelösch: 8

Raphael Schneeberger 4.8.2017 09:13  
Gelösch: 22

Raphael Schneeberger 4.8.2017 09:13  
Gelösch: 15

Raphael Schneeberger 4.8.2017 09:13  
Gelösch: 12

Raphael Schneeberger 4.8.2017 09:13  
Gelösch: 21

fault. By linearly interpolating the two traces, we obtained a model, which we called 'best estimate' model. In total, 11 group A faults reach the GTS. From the total 11, 7 have a dip  $<80^\circ$ , which would correspond to the major structures defined in the above presented GTS-scale model, whereas the 4 steeper faults correspond to relay structures. Moreover, 2 group B and 8 group C faults connect the surface with the GTS. Combination of all faults yields an average spacing of 25.4 m.

5 Furthermore, faults appear to converge with depth.

### 4.3.3. Bayesian inference

For each model that is obtained when each surface point (intersection between surface fault and 2D section along GTS) is interpolated with a specific underground point, the number of intersections was calculated and the likelihood of the model compiled based on the number of intersections. In total 10'000 models were calculated and for each a probability for a certain interpolation of a specific surface point with an underground point was obtained (Fig. 9). For certain surface points, a clear maximum a posteriori value was found (Fig. 9a-d), however, for other surface points no underground point could be assigned unambiguously (Fig. 9e).

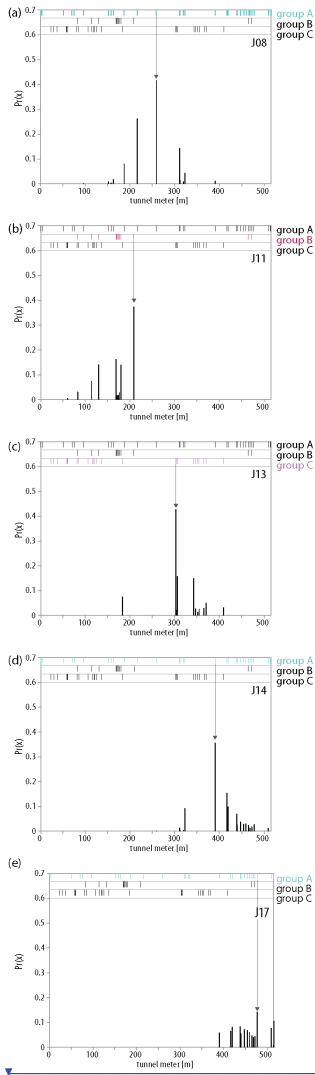

Raphael Schneeberger 4.8.2017 09:07

Gelöscht: 10

Raphael Schneeberger 4.8.2017 09:07

Gelöscht: 10a

Raphael Schneeberger 4.8.2017 09:07

Gelöscht: 10e

Raphael Schneeberger 4.8.2017 09:14

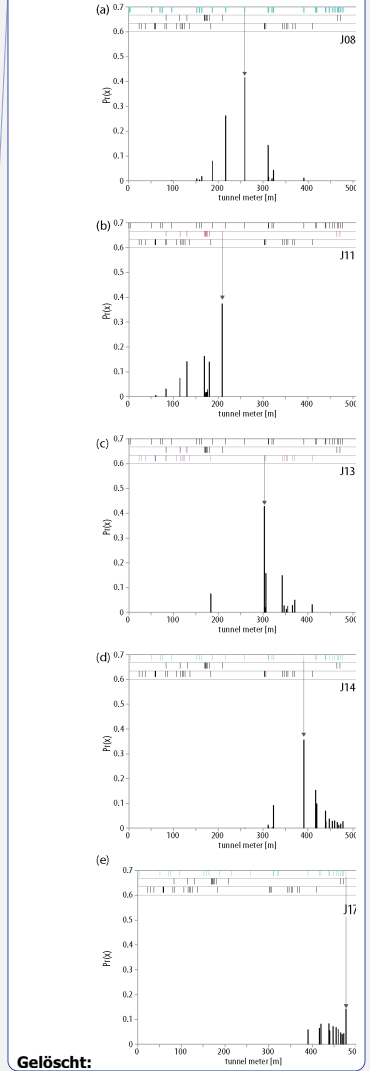

Gelöscht:

Figure 9. Probability distributions of five selected examples: (a) to (d) with highest probabilities achieved, whereas (e) shows an example without clear maximum probability. On top are indicated the positions of the underground deformations zones, grouped according to their strike. Additionally, the 'maximum a posteriori' interpolation is highlighted with an arrow.

Based on the maximum a posteriori value a 3D structural model was obtained by linearly interpolating each surface point to the underground point with the maximum a posteriori value. We call this model the 'maximum a posteriori' model (Fig. 10). Notice that the 'maximum a posteriori' model only adds information to the initial model through consideration of a likelihood, i.e. the assumption that crossing faults at large-scale are unlikely. Note that the smaller scaled relay structures are not considered in this approach.

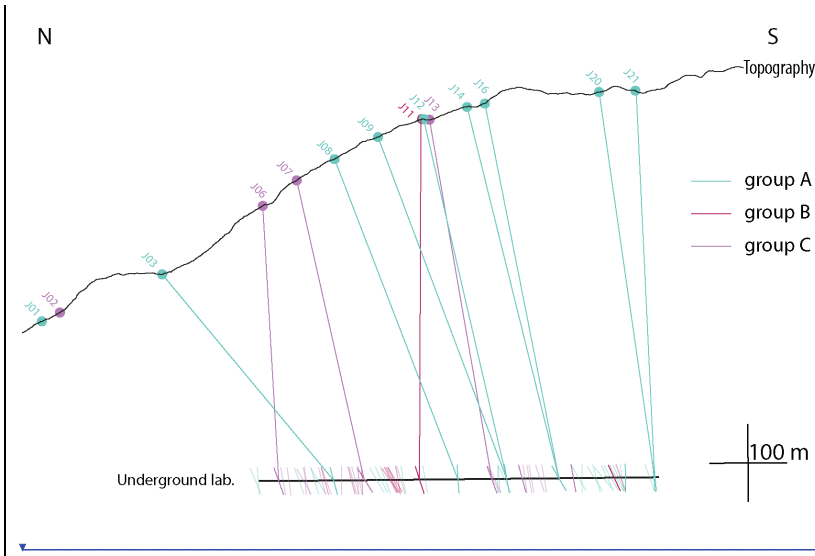

Figure 10. Cross section showing 'maximum a posteriori' connections between surface and underground faults. Faults are grouped and coloured according to their strike. Underground faults are represented by short ticks where the less transparent are the ones with connection to the surface

This 'maximum a posteriori' interpolation model served as basis for comparing different employed extrapolation approaches. The comparison did not yield a clear 'best' extrapolation approach, however, it seems that fieldwork-based approach results in most accurate extrapolation.

## 5. Discussion

### 5.1 Lineament map

Comparison of the remote-sensing based lineament map and field data showed that in intact granitic rocks, purely ductile shear zones without later brittle overprinted are not detected by remote sensing. Brittle deformation generating fractures, cataclases or even fault gouges responsible for mechanical weakening is necessary to form morphologically detectable structures (Fig. 11a; Baumberger, 2015). Moreover, the orientations of the slopes play an important role, as faults striking down dip directions of slopes are prone to most effective erosion processes driven by gravity. Different orientations observed on the lineament map (Fig. 6a, areas (i) and (ii)) for the eastern and western flank of the Hasli valley are interpreted to result from such preferential erosion. In contrast, surface area (iii) in Fig. 6a is nearly horizontal and thus reflecting a homogeneously eroded pattern of intersection for lineaments. The dependence on erosion for the formation of morphological incisions leads to the observed heterogeneous lineament density distribution as ridges and valleys show higher lineament densities.

Raphael Schneeberger 4.8.2017 09:07  
Gelösch: 10

Raphael Schneeberger 4.8.2017 09:08  
Gelösch: 11

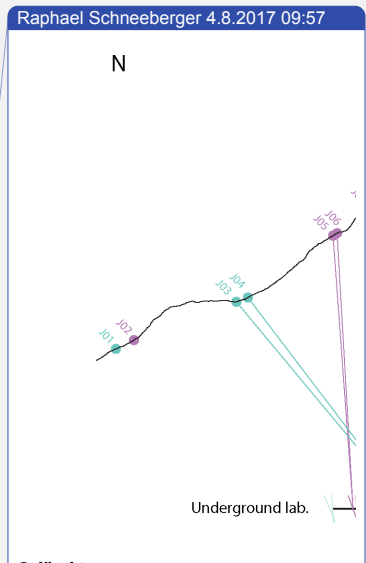

Raphael Schneeberger 4.8.2017 09:08  
Gelösch: 1

Raphael Schneeberger 4.8.2017 09:08  
Gelösch: 12a

Raphael Schneeberger 4.8.2017 09:08  
Gelösch: 7a

Raphael Schneeberger 4.8.2017 09:08  
Gelösch: 7a

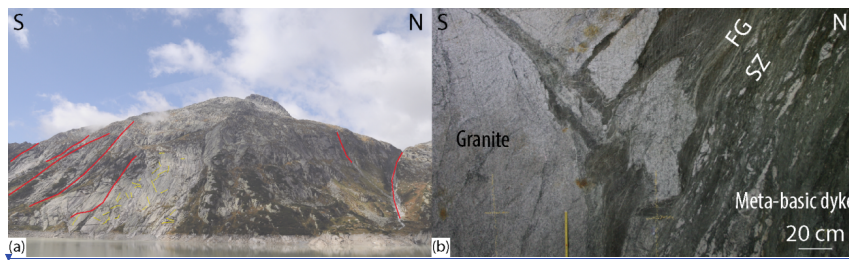

**Figure 11. (a) Mountainside with incisions and exfoliation joints. (b) detailed picture of underground outcrop showing outcrop conditions and key structural features: ductile shear zone (SZ) and a fault gouge (FG).**

Endpoint-to-endpoint strike and strikes of individual segments of lineaments are very similar (Fig. 6b and e) indicating only small variation in strike of the lineaments themselves. Therefore, underlying structures should be quasilinear to linear in 2D and planar in 3D. We also observe that the longest lineaments are NE-SW striking and that the variability shown in Fig. 6e is mostly due to varying strike orientations of very short lineaments (<20m). In addition to the NE-SW striking maximum, few long lineaments strike NW-SE. Both major orientations are similar to those reported from field observations (Figs. 7 and 8) and correlate with previous studies (Rolland et al., 2009; Steck, 1968; Wehrens et al., 2017), indicating that lineament maps are suitable to obtain the general trend of steep faults in well exposed crystalline terrain. Much care is needed, however, when further interpreting lineament maps as the geologic meaning of the lineament is ambiguous and as lineament maps are strongly operator dependent (e.g. Scheiber et al., 2015).

### 5.2. Field observations and data

Differences between the surface map and the underground map are relatively small. The spacing of faults at the surface is lower, but general orientations are comparable (Figs. 7 and 8) and the two mappings are thus discussed conjointly.

Faults commonly show little variation in orientation along strike as evidenced by consistent orientations of dip and dip azimuth of multiple outcrop descriptions along the same fault. In conjunction with the small variability in strike for lineaments, this is clear evidence for the planarity of large-scale faults. At the surface, the 2D length of faults is between 229 and 5591 m (mean  $2199 \pm 1603$  m). Therefore, extrapolation of surface faults to depths similar to depths of the underground faults, which have an overburden between 420 and 520 m, is well in the projection depth range, assuming a circular shape for the plane as a minimum estimation for their lateral extent.

Localization processes seem to differ between the two host rocks (CAGr and GrGr; Wehrens et al., 2017). The higher amount of biotite in the GrGr could influence the rock's rheology towards more ductile behaviour. In contrast, the relatively higher amount of quartz and K-feldspars renders the CAGr more brittle than GrGr at similar P-T conditions and thus enforces brittle fracturing and possible subsequent ductile shear zone widening, as observed in other crystalline rocks (Guermani and Pennacchioni, 1998; Mancktelow and Pennacchioni, 2005; Wehrens et al., 2016, 2017). Hence any mechanical anisotropy, such as along pre-existing structures in form of magmatic shear zones, meta-basic dykes or aplitic dykes served in the CAGr as sites for strain localization when suitably oriented with respect to the stress field.

### 5.3. 3D structural modelling

Our 3D structural models were generated as contribution to a project monitoring several parameters such as micro-seismicity and in-situ stress conditions on the km-scale (Large Scale Monitoring, Nagra). Therefore, 3D structural models were required mostly for visualization purposes. A deterministic explicit modelling workflow was required, as often used in applied projects. It is, however, clear that for model updating an implicit modelling approach would result in faster data handling. The deterministic approach was chosen, because we attempted to obtain a geometrically satisfying product within the simplest geological setting possible. Furthermore, we were interested in the actual geometry of the faults dissecting

Raphael Schneeberger 4.8.2017 09:14

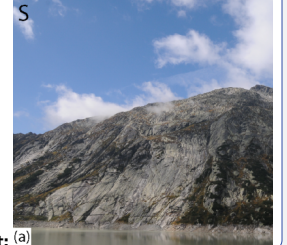

Gelöscht: (a)

Raphael Schneeberger 4.8.2017 09:08

Gelöscht: 12

Raphael Schneeberger 4.8.2017 09:08

Gelöscht: 7b

Raphael Schneeberger 4.8.2017 09:08

Gelöscht: 7e

Raphael Schneeberger 4.8.2017 09:08

Gelöscht: 8

Raphael Schneeberger 4.8.2017 09:08

Gelöscht: 9

Raphael Schneeberger 4.8.2017 09:08

Gelöscht: 8

Raphael Schneeberger 4.8.2017 09:08

Gelöscht: 9

Raphael Schneeberger 4.8.2017 09:15

Gelöscht: without requiring statistical approximations for representing fault patterns.



granitoid rock bodies. [Lastly, the uncommonly well-constrained setting of our study site \(high-resolution underground data\) was used to test and potentially validate extrapolation techniques for common application. Therefore, the underground data was only integrated as validation and not as constrain during interpolation.](#)

### 5.3.1. Three different approaches to obtain extrapolation 3D structural models (km-scale models)

Uncertainty related to the assignment of specific dip values to lineament traces (Baumberger, 2015; Bistacchi et al., 2008) led to the comparison of three different approaches. Validation attempts by comparison with underground mapping are purely geometrical and were based on two criteria, namely angle and distance misfit (Fig. 4). All three extrapolation approaches yielded similar results and no significant differences were observed. Moreover, in order to allow for a thorough comparison between the different extrapolation approaches solely based on the angle and distance misfit, the underground faults would need to be homogeneously distributed, which is not the case (Fig. 8).

The validation procedure could be refined using fault [core](#) thickness. However, fault thickness varies substantially along strike (e.g. Torabi and Berg, 2011) and thus is not a clear distinction criterion.

In addition to the average dip, the maximum and minimum dips could be used, which would yield a projection cone, similar to uncertainty visualization suggested by Baumberger (2015). Applying this approach to a restricted area such as the underground rock laboratory investigated in this study, resulted in a total coverage and no possible distinction between different faults. However, for a final representation of the uncertainty related to the dip value on a regional scale (km-scale) the approach to visualize projection cones would suit.

### 5.3.2. GTS (decametre scale model) compared with km-scale 'best-estimate' model

As a result of differences in outcrop conditions, the number of observed faults is significantly higher in the underground laboratory compared to the surface (Fig. 12). In the underground, nearly 100% of polished outcrop is accessible along the tunnel walls (Fig. 11b), whereas at the surface faults are often covered with vegetation, even in relatively vegetation-poor domains.

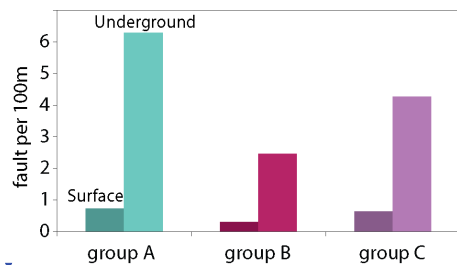

Figure 12. Histogram showing number of faults grouped per strike at the Earth's surface and in the underground (GTS).

Furthermore, we observe convergence of surface faults with depth in our 'best estimate' model, which could be a modelling artefact. [The N-S extent of surface area is larger compared to the GTS area, leaving a northern and a southern surface part underneath which no underground data exists \(Fig. 10\). Hence faults in these domains are forced by the model setup to be connected to the underground, leading to artificial fault orientations in these two cases \(N and S rims of Fig. 13a\). For that reason, only faults in the central part of the 'best estimate' model will be further considered.](#)

### 5.4.3. 'Maximum a posteriori' model

Comparison of numerous models obtained from Bayesian inference was performed calculating the number of intersections. The fewer intersections the more probable the model was considered. Assuming no intersections [within](#) large-scale fault set is simplistic, but from field observations seems plausible (Fig. 7) as a first approach for faults belonging to a specific orientation group (group A, B, C). [The 'maximum a posteriori' model is based on a N-S cross-section along the GTS, this orientation implies that fault would only cross if their dip varies strongly. Such a strong variation in the dip value is improbable based on measured dip values \(Fig. 7\). Therefore, this assumption seems feasible.](#)

Raphael Schneeberger 4.8.2017 09:09

Gelöscht: 9

Raphael Schneeberger 4.8.2017 09:09

Gelöscht: 13

Raphael Schneeberger 4.8.2017 09:09

Gelöscht: 12b

Raphael Schneeberger 4.8.2017 10:01

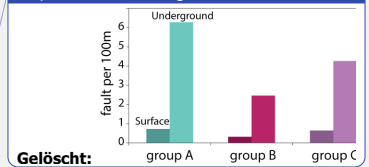

Gelöscht:

Raphael Schneeberger 4.8.2017 09:09

Gelöscht: 13

Raphael Schneeberger 4.8.2017 09:17

Gelöscht: Therefore, faults were potentially passively rotated, yielding a 'pseudo' convergence. Moreover, no similar pattern was observed in the GTS model (decametre scale). We therefore conclude that the 'best estimate' interpolation model suffers from boundary effects, altering the fault orientation at the margin of the GTS and thus only faults in the central part will be further considered.

Raphael Schneeberger 4.8.2017 09:17

Gelöscht: between

This simplistic representation of nature enabled us to obtain a probability for all possible interpolations between a specific surface point and all underground points of the corresponding orientation group. As previously mentioned, the margins of the interpolation space show boundary artefacts and thus following surface points at model margin were not further considered: J03, J06, J20, and J21 (Fig. 8). As expected, probability densities are skewed towards the area of lesser fault density (Fig. 9). At this point it is important to remind that probability density is given as area and therefore we cannot directly compare the discretized posteriors since they are function of the distance between nearby faults.

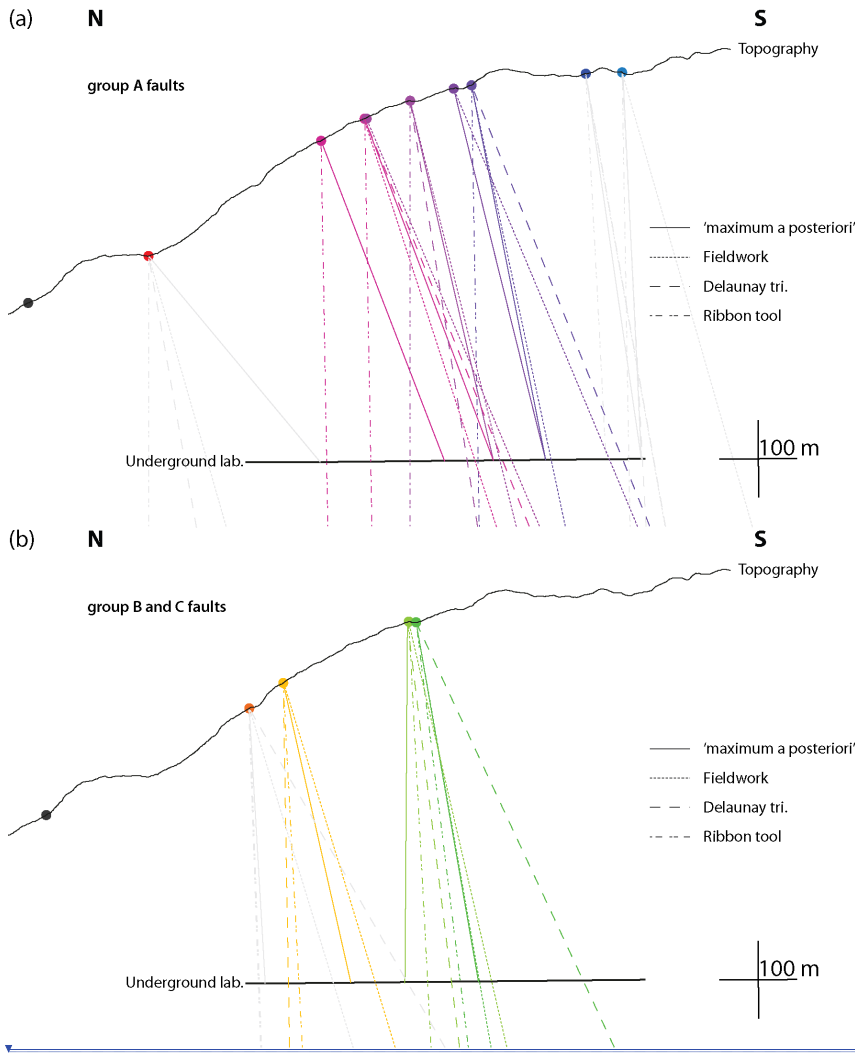

Figure 13. Comparison of 'maximum a posteriori' interpolation with three extrapolation approaches used to assign dip to fault exposure line. Figure subdivided in: (a) group A (NE-SW) and (b) group B (E-W) and group C (NW-SE). group B and group C are display conjointly as group B contains only two faults.

We compared the initially used three extrapolation techniques based on the 'maximum a posteriori' model (Fig. 13). When comparing group A faults, fieldwork-based extrapolation closely fit the 'maximum a posteriori' interpolation, which indicates either that the fieldwork-based model yields 'best' results or validates the Bayesian inference approach depending if the reference state is the statistical interpolation or the measured field data. Generally, dips of 'maximum a posteriori'

Raphael Schneeberger 4.8.2017 09:19

Gelösch: J04, J05

Raphael Schneeberger 4.8.2017 09:20

Gelösch: J19,

Raphael Schneeberger 4.8.2017 09:09

Gelösch: 9

Raphael Schneeberger 4.8.2017 09:09

Gelösch: 10

Raphael Schneeberger 4.8.2017 10:01

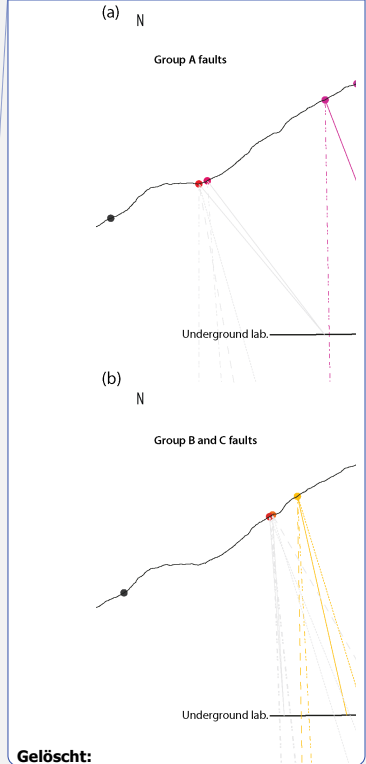

Gelösch:

Raphael Schneeberger 4.8.2017 09:09

Gelösch: 14

Raphael Schneeberger 4.8.2017 09:09

Gelösch: 14

models are slightly steeper than measured dips during fieldwork (Fig. 14a). However, the dip differences between the fieldwork-based extrapolation 3D structural model and the 'maximum a posteriori' interpolation model are small (Fig. 14b). Also the dip differences between the ribbon tool based 3D structural model and the 'maximum a posteriori' interpolation model are small, but dips obtained via the ribbon tool are systematically steeper, which do not correspond to the measured dips (Fig. 14a). Extrapolation 3D structural model obtained via Delaunay triangulation is less close to 'maximum a posteriori' interpolation model and obtained dips vary substantially.

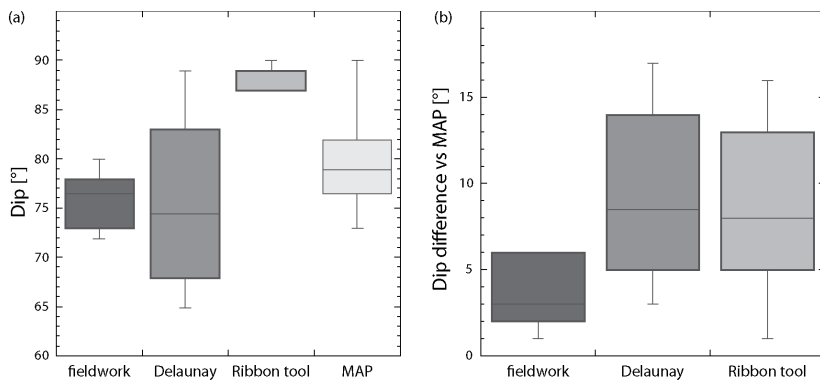

Figure 14. (a) Box plot showing dip value for different extrapolation approaches and for 'maximum a posteriori' (MAP) interpolation. (b) Box plots for dip comparison between different extrapolation approaches and the 'maximum a posteriori' (MAP) interpolation.

Comparison for the group B and C faults is less clear. Fieldwork-based and ribbon tool extrapolations are close to the 'maximum a posteriori' model (Fig. 13). Therefore, we conclude that fieldwork is still necessary for 3D structural modelling in crystalline environment and that the ribbon tool (Move™) offers numerous options to tune the obtained plane, however, this tuning requires a profound conceptual background model.

#### 5.4.4. Possible model refinements

Presented surface models include only major faults (Fig. 15). However, for further applications such as for example groundwater flow modelling or slip tendency analysis not solely major faults are of interest but also their relay structures. Based on the orientation information gained from the regional km-scale models and on the intersection pattern observed during lineament mapping it is possible to infer a near surface 3D model not only with the major fault but also the relay structure. Furthermore, the increased level of detail in the GTS model (decametre scale) forms a similar model in the underground. The unknown space between both models would require probabilistic modelling with several key parameters as for example fault spacing, fault orientations, apertures or crosscutting relationships.

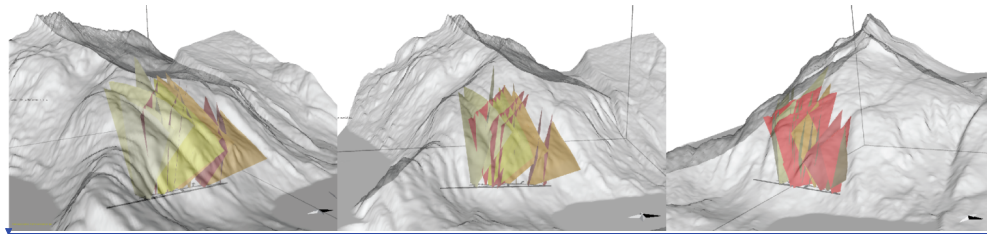

Figure 15. Representation in 3D of the 'maximum a posteriori' model of fault geometry with three different angle of view. N is indicated by the black triangle. The black tunnel is 717 m long.

Raphael Schneeberger 4.8.2017 09:09

Gelösch: 15a

Raphael Schneeberger 4.8.2017 09:09

Gelösch: 15b

Raphael Schneeberger 4.8.2017 09:09

Gelösch: 15a

Raphael Schneeberger 4.8.2017 10:05

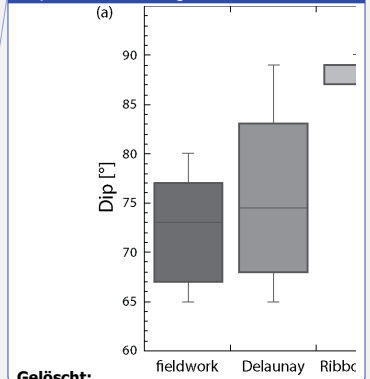

Gelösch:

Unknown

Formatiert: Schriftart:Fett

Raphael Schneeberger 4.8.2017 09:09

Gelösch: 15

Raphael Schneeberger 4.8.2017 09:09

Gelösch: 14

Raphael Schneeberger 4.8.2017 09:09

Gelösch: 16

Raphael Schneeberger 4.8.2017 10:05

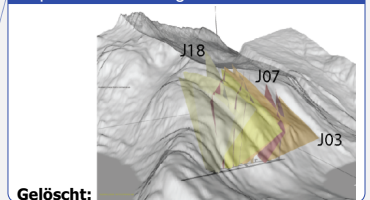

Gelösch:

Raphael Schneeberger 4.8.2017 09:10

Gelösch: 16

## 6. Conclusions

The exceptional opportunity of surface and underground data comparison over 3D structural modelling approaches led us to the following conclusions:

- Lineament maps enable identification of major fault, but are highly sensitive to preferential erosion.
- Structural surface mapping allowed a discrimination of three orientation groups of faults.
- Comparison based on geometrical criteria (distance and angle misfit) of three approaches to extrapolate to depth surface traces yielded comparable results for all extrapolation approaches.
- Interpolation of surface data with underground data based on a Bayesian inference problem showed that the fieldwork-based approach is most accurate extrapolation technique. However, this could also validate the interpolation approach.

We conclude, similarly to Zanchi et al. (2009) that for 3D structural modelling a [high-topography](#) area within crystalline bedrock classical fieldwork [as information source and as base](#) for a conceptual background model on which interpolations or extrapolations performed within 3D structural modelling can be examined for their validity. [In terms of general fault networks, our approach can be applied to \(i\) pervasive regional fault/fracture patterns. Currently it will fail in the case of \(ii\) discrete large-scale faults \(e.g. strike slip faults\) consisting of one fault core and associated damage zone. In such cases, more elaborate probabilistic models have to be generated in future, including 3D variations in terms of spacing and orientation of secondary faults and splay faults. For \(i\) even with few or even missing underground information our approach can be used to predict a surface-based 2D model including a probability evaluation \(e.g. variable dip angles\) with depth. If available, this evaluation can be tested with individual depth points such as drill core information. Additionally, an expansion towards 3D would require probability attributes for dip azimuths.](#)

### Competing interest

The authors declare that they have no conflict of interest

### Acknowledgments

This study was funded by the LASMO project run by NAGRA, RWM and SURAO. We thank NAGRA staff in the underground rock laboratory for excellent working environment. We thank the reviewers, [Clare Bond, Gautier Laurent and an anonymous reviewer](#), whose comments greatly improved the manuscript.

### References

- Abrecht, J.: Geologic units of the Aar massif and their pre-Alpine rock associations: a critical review, Schweizerische Mineral. und Petrogr. Mitteilungen, 74(1), 5–27, doi:10.5169/seals-56328, 1994.
- Balaban, I. J.: An optimal algorithm for finding segments intersections, in Proceedings of the eleventh annual symposium on Computational geometry - SCG '95, pp. 211–219, ACM Press, New York, New York, USA., 1995.
- Baumberger, R.: Quantification of lineaments: Link between internal 3D structure and surface evolution of the Hasli valley (Aar massif, Central Alps, Switzerland), PhD thesis, University of Bern, Switzerland., 2015.
- Belgrano, T. M., Herwegh, M. and Berger, A.: Inherited structural controls on fault geometry, architecture and hydrothermal activity : an example from Grimsel Pass, Switzerland, Swiss J. Geosci., 109(3), 345–364, doi:10.1007/s00015-016-0212-9,

Raphael Schneeberger 14.8.2017 16:12  
**Gelöscht:** and less than 6% distance misfit

Raphael Schneeberger 4.8.2017 09:20  
**Gelöscht:** n

Raphael Schneeberger 4.8.2017 09:21  
**Gelöscht:** is required not only for field measurements but also as

Raphael Schneeberger 4.8.2017 09:21  
**Gelöscht:** (names or anonymous)

- 2016.
- Bense, F. A., Wemmer, K., Löbens, S. and Siegesmund, S.: Fault gouge analyses: K-Ar illite dating, clay mineralogy and tectonic significance—a study from the Sierras Pampeanas, Argentina, *Int. J. Earth Sci.*, 103(1), 189–218, doi:10.1007/s00531-013-0956-7, 2014.
- 5 Bentley, J. L. and Ottmann, T. A.: Algorithms for Reporting and Counting Geometric Intersections, *IEEE Trans. Comput.*, C-28(9), 643–647, doi:10.1109/TC.1979.1675432, 1979.
- Berger, A., Mercolli, I., Herwegh, M. and Gnos, E.: Explanatory notes accompanying the geological map of the Aar massif and the Tavetsch- and Gotthard Nappes, Geological Special Map 129, Swisstopo, Wabern, Switzerland., 2017.
- Bistacchi, A., Massironi, M., Dal Piaz, G. V., Dal Piaz, G., Monopoli, B., Schiavo, A. and Toffolon, G.: 3D fold and fault reconstruction with an uncertainty model: An example from an Alpine tunnel case study, *Comput. Geosci.*, 34(4), 351–372, doi:10.1016/j.cageo.2007.04.002, 2008.
- 10 Bond, C. E.: Uncertainty in structural interpretation: Lessons to be learnt, *J. Struct. Geol.*, 74, 185–200, doi:10.1016/j.jsg.2015.03.003, 2015.
- Bond, C. E., Shipton, Z. K., Jones, R. R., Butler, R. W. H. and Gibbs, A. D.: Knowledge Transfer in a digital world: Field data acquisition, uncertainty and data management, *Geosphere*, 3(6), 568–576, doi:10.1130/GES00094.1, 2007a.
- 15 Bond, C. E., Gibbs, A. D., Shipton, Z. K. and Jones, S.: What do you think this is? “Conceptual uncertainty” In geoscience interpretation, *GSA Today*, 17(11), 4–10, doi:10.1130/GSAT01711A.1, 2007b.
- Bossart, P. and Mazurek, M.: Structural geology and water flow-paths in the migration shear-zone, Nagra technical report NTB 91-12, Wettingen, Switzerland., 1991.
- 20 Caumon, G., Collon-Drouaillet, P., Le Carlier de Veslud, C., Viseur, S. and Sausse, J.: Surface-Based 3D Modeling of Geological Structures, *Math. Geosci.*, 41(8), 927–945, doi:10.1007/s11004-009-9244-2, 2009.
- Challandes, N., Marquer, D. and Villa, I. M.: P-T-t modelling, fluid circulation, and <sup>39</sup>Ar-<sup>40</sup>Ar and Rb-Sr mica ages in the Aar Massif shear zones (Swiss Alps), *Swiss J. Geosci.*, 101(2), 269–288, doi:10.1007/s00015-008-1260-6, 2008.
- Cherpeau, N. and Caumon, G.: Stochastic structural modelling in sparse data situations, *Pet. Geosci.*, 21(4), 233–247, doi:10.1144/petgeo2013-030, 2015.
- 25 Cherpeau, N., Caumon, G., Caers, J. and Løvy, B.: Method for Stochastic Inverse Modeling of Fault Geometry and Connectivity Using Flow Data., 2012.
- Choukroune, P. and Gapais, D.: Strain pattern in the Aar Granite (Central Alps): orthogneiss developed by bulk inhomogeneous flattening, *J. Struct. Geol.*, 5, 411–418, 1983.
- 30 Delaunay, B.: Sur la sphère vide. A la mémoire de Georges Voronoi, *Bull. l’Académie des Sci. l’URSS. Cl. des Sci. mathématiques Nat.*, 6, 793–800, 1934.
- Fernández, O.: Obtaining a best fitting plane through 3D georeferenced data, *J. Struct. Geol.*, 27(5), 855–858, doi:10.1016/j.jsg.2004.12.004, 2005.
- Gabrielsen, R. H. and Braathen, A.: Models of fracture lineaments - Joint swarms, fracture corridors and faults in crystalline rocks, and their genetic relations, *Tectonophysics*, 628, 26–44, doi:10.1016/j.tecto.2014.04.022, 2014.
- 35 Goncalves, P., Oliot, E., Marquer, D. and Connolly, J. A. D.: Role of chemical processes on shear zone formation: an example from the Grimsel metagranodiorite (Aar massif, Central Alps), *J. Metamorph. Geol.*, 30(7), 703–722, doi:10.1111/j.1525-1314.2012.00991.x, 2012.
- González-García, J. and Jessell, M.: A 3D geological model for the Ruiz-Tolima Volcanic Massif (Colombia): Assessment of geological uncertainty using a stochastic approach based on Bézier curve design, *Tectonophysics*, 687, 139–157, doi:10.1016/j.tecto.2016.09.011, 2016.
- 40 Guermani, A. and Pennacchioni, G.: Brittle precursors of plastic deformation in a granite: an example from the Mont Blanc massif (Helvetic, western Alps), *J. Struct. Geol.*, 20(3), 135–148, doi:10.1016/S0191-8141(97)00080-1, 1998.

- Haario, H., Saksman, E. and Tamminen, J.: An adaptive metropolis algorithm, *Bernoulli*, 7, 223–242, doi:10.3318737, 2001.
- Hassen, I., Gibson, H., Hamzaoui-Azaza, F., Negro, F., Rachid, K. and Bouhlila, R.: 3D geological modeling of the Kasserine Aquifer System, Central Tunisia: New insights into aquifer-geometry and interconnections for a better assessment of groundwater resources, *J. Hydrol.*, 539, 223–236, doi:10.1016/j.jhydrol.2016.05.034, 2016.
- 5 Heilbronner, R. and Barrett, S.: *Image Analysis in Earth Sciences*, Springer, Berlin Heidelberg., 2014.
- Herwegh, M., Berger, A., Baumberger, R., Wehrens, P. and Kissling, E.: Large-Scale Crustal-Block-Extrusion During Late Alpine Collision, *Sci. Rep.*, 7, doi:10.1038/s41598-017-00440-0, 2017.
- Hollund, K., Mostad, P., Fredrik Nielsen, B., Holden, L., Gjerde, J., Consursi, M. J., McCann, A. J., Townsend, C. and E., S.: Havana - a fault modeling tool, *Nor. Pet. Soc. Spec. Publ.*, 11, 157–171, 2002.
- 10 Jessell, M. W., Aillères, L. and de Kemp, E. A.: Towards an integrated inversion of geoscientific data: What price of geology?, *Tectonophysics*, 490(3–4), 294–306, doi:10.1016/j.tecto.2010.05.020, 2010.
- Jones, R. R., McCaffrey, K. J. W., Clegg, P., Wilson, R. W., Holliman, N. S., Holdsworth, R. E., Imber, J. and Waggott, S.: Integration of regional to outcrop digital data: 3D visualisation of multi-scale geological models, *Comput. Geosci.*, 35(1), 4–18, doi:10.1016/j.cageo.2007.09.007, 2009.
- 15 Jørgensen, F., Høyer, A., Sandersen, P. B. E. and He, X.: Combining 3D geological modelling techniques to address variations in geology , data type and density – An example from Southern Denmark, *Comput. Geosci.*, 81, 53–63, doi:10.1016/j.cageo.2015.04.010, 2015.
- Kaufmann, O. and Martin, T.: 3D geological modelling from boreholes, cross-sections and geological maps, application over former natural gas storages in coal mines, *Comput. Geosci.*, 35(1), 70–82, doi:10.1016/S0098-3004(08)00227-6, 2009.
- 20 Keusen, H. R., Ganguin, J., Schuler, P. and Buletti, M.: *Felslabor Grimsel: Geologie*, Nagra technical report NTB 87-14, Baden, Switzerland., 1989.
- Koike, K., Kubo, T., Liu, C., Masoud, A., Amano, K., Kurihara, A., Matsuoka, T. and Lanyon, B.: 3D geostatistical modeling of fracture system in a granitic massif to characterize hydraulic properties and fracture distribution, *Tectonophysics*, 660, 1–16, doi:10.1016/j.tecto.2015.06.008, 2015.
- 25 Kralik, M., Clauer, N., Holnsteiner, R., Huemer, H. and Kappel, F.: Recurrent fault activity in the Grimsel Test Site (GTS, Switzerland): revealed by Rb-Sr, K-Ar and tritium isotope techniques, *J. Geol. Soc. London.*, 149(2), 293–301, 1992.
- de la Varga, M. and Wellmann, J. F.: Structural geologic modeling as an inference problem: A Bayesian perspective, *Interpretation*, 4(3), SM1-SM16, 2016.
- Labhart, T.: *Aarmassiv und Gotthardmassiv*, Gebrüder Borntraeger Verlagsbuchhandlung., 1977.
- 30 Lindsay, M. D., Aillères, L., Jessell, M. W., de Kemp, E. A. and Betts, P. G.: Locating and quantifying geological uncertainty in three-dimensional models: Analysis of the Gippsland Basin, southeastern Australia, *Tectonophysics*, 546–547, 10–27, doi:10.1016/j.tecto.2012.04.007, 2012.
- MacKay, D. J. C.: *Information Theory, Inference, and Learning Algorithms*, 4th editio., Cambridge University Press, Cambridge, UK., 2003.
- 35 Mancktelow, N. S. and Pennacchioni, G.: The control of precursor brittle fracture and fluid–rock interaction on the development of single and paired ductile shear zones, *J. Struct. Geol.*, 27(4), 645–661, doi:10.1016/j.jsg.2004.12.001, 2005.
- Marquer, D., Gapais, D. and Capdevila, R.: Chemical-changes and mylonitization of a granodiorite within low-grade metamorphism (Aar massif, central Alps), *Bull. Mineral.*, 108(2), 209–221, 1985.
- Mazurek, M.: Geological and hydraulic properties of water-conducting features in crystalline rocks, in *Hydrogeology of crystalline rocks*, vol. 34, edited by I. Stober and K. Bucher, pp. 3–26, Springer Netherlands., 2000.
- 40 Mercolli, I. and Oberhänsli, R.: Variscan tectonic evolution in the Central Alps: a working hypothesis, *Schweizerische Mineral. und Petrogr. Mitteilungen*, 68(3), 491–500, doi:10.5169/seals-52084, 1988.
- O’Leary, D. W., Friedman, J. D. and Pohn, H. A.: Lineament , linear , lineation : Some proposed new standards for old

- terms, *Geol. Soc. Am. Bull.*, 87(10), 1463–1469, doi:10.1130/0016-7606(1976)87<1463, 1976.
- Oberhänsli, R.: Geochemistry of meta-lamprophyres from the Central Swiss Alps, *Schweizerische Mineral. und Petrogr. Mitteilungen*, 66, 315–342, 1986.
- Patil, A., Huard, D. and Fannesbeck, C. J.: PyMC: Bayesian stochastic modelling in Python, *J. Stat. Softw.*, 35(4), 1, 2010.
- 5 Pfiffner, O. A.: *Geologie der Alpen*, Haupt Verlag, Bern, Stuttgart, Wien., 2009.
- Pfiffner, O. A. and Deichmann, N.: *Seismotektonik der Zentralschweiz*, Wettingen, Switzerland., 2014.
- von Raumer, J. F., Bussy, F. and Stampfli, G. M.: The Variscan evolution in the External massifs of the Alps and place in their Variscan framework, *Comptes Rendus Geosci.*, 341(2–3), 239–252, doi:10.1016/j.crte.2008.11.007, 2009.
- Rolland, Y., Cox, S. F. and Corsini, M.: Constraining deformation stages in brittle–ductile shear zones from combined field mapping and <sup>40</sup>Ar/<sup>39</sup>Ar dating: The structural evolution of the Grimsel Pass area (Aar Massif, Swiss Alps), *J. Struct. Geol.*, 10 31(11), 1377–1394, doi:10.1016/j.jsg.2009.08.003, 2009.
- Sausse, J., Dezayes, C., Dorbath, L., Genter, A. and Place, J.: 3D model of fracture zones at Soultz-sous-Forêts based on geological data, image logs, induced microseismicity and vertical seismic profiles, *Comptes Rendus - Geosci.*, 342(7–8), 531–545, doi:10.1016/j.crte.2010.01.011, 2010.
- 15 Schaltegger, U.: The Central Aar Granite: Highly differentiated calc-alkaline magmatism in the Aar massif (Central Alps, Switzerland), *Eur. J. Mineral.*, 2, 245–259, 1990.
- Schaltegger, U.: Unravelling the pre-Mesozoic history of Aar and Gotthard massifs (Central Alps) by isotopic dating: a review, *Schweizerische Mineral. und Petrogr. Mitteilungen*, 74(1), 41–51, doi:10.5169/seals-56330, 1994.
- Schaltegger, U. and Corfu, F.: The age and source of late Hercynian magmatism in the central Alps: evidence from precise 20 U-Pb ages and initial Hf isotopes, *Contrib. to Mineral. Petrol.*, 111, 329–344, 1992.
- Scheiber, T., Fredin, O., Viola, G., Jarna, A., Gasser, D. and Lapińska-Viola, R.: Manual extraction of bedrock lineaments from high-resolution LiDAR data: methodological bias and human perception, *Gff*, 5897(November), 1–11, doi:10.1080/11035897.2015.1085434, 2015.
- Schneeberger, R., Berger, A., Herwegh, M., Eugster, A., Kober, F., Spillmann, T. and Blechschmidt, I.: GTS Phase VI - 25 LASMO: Geology and structures of the GTS and Grimsel region, Nagra Arbeitsbericht NAB 16-27, Wettingen, Switzerland., 2016.
- Stalder, H. A.: *Petrographische und mineralogische Untersuchungen im Grimselgebiet (Mittleres Aarmassiv)*, PhD thesis, University of Bern, Switzerland., 1964.
- Steck, A.: Die alpidischen Strukturen in den Zentralen Aaregranite des westlichen Aarmassivs, *Eclogae Geol. Helv.*, 61(1), 30 19–48, doi:10.5169/seals-163584, 1968.
- Stephens, M. B., Follin, S., Petersson, J., Isaksson, H., Juhlin, C. and Simeonov, A.: Review of the deterministic modelling of deformation zones and fracture domains at the site proposed for a spent nuclear fuel repository, Sweden, and consequences of structural anisotropy, *Tectonophysics*, 653, 68–94, doi:10.1016/j.tecto.2015.03.027, 2015.
- Svensk Kärnbränslehantering AB: Site description of Laxemar a completion of the site investigation phase., 2009.
- 35 Tacher, L., Pomian-Szednicki, I. and Parriaux, A.: Geological uncertainties associated with 3-D subsurface models, *Comput. Geosci.*, 32(2), 212–221, doi:10.1016/j.cageo.2005.06.010, 2006.
- Torabi, A. and Berg, S. S.: Scaling of fault attributes: A review, *Mar. Pet. Geol.*, 28(8), 1444–1460, doi:10.1016/j.marpetgeo.2011.04.003, 2011.
- Viard, T., Caumon, G. and Lévy, B.: Adjacent versus coincident representations of geospatial uncertainty: Which promote better decisions?, *Comput. Geosci.*, 37(4), 511–520, doi:10.1016/j.cageo.2010.08.004, 2011.
- 40 Vouillomaz, J.: *Strain localization along shear zones in the Juchlistock area*, Master thesis, University of Bern, Switzerland., 2009.
- Wehrens, P., Berger, A., Peters, M., Spillmann, T. and Herwegh, M.: Deformation at the frictional-viscous transition:



- Evidence for cycles of fluid-assisted embrittlement and ductile deformation in the granitoid crust, *Tectonophysics*, 693, 66–84, doi:10.1016/j.tecto.2016.10.022, 2016.
- Wehrens, P., Baumberger, R., Berger, A. and Herwegh, M.: How is strain localized in a mid-crustal basement section? Spatial distribution of deformation in the Aar massif ( Switzerland ), *J. Struct. Geol.*, 94, 47–67, doi:10.1016/j.jsg.2016.11.004, 2017.
- Wellmann, J. F. and Regenauer-Lieb, K.: Uncertainties have a meaning: Information entropy as a quality measure for 3-D geological models, *Tectonophysics*, 526–529, 207–216, doi:10.1016/j.tecto.2011.05.001, 2012.
- Wellmann, J. F., Horowitz, F. G., Schill, E. and Regenauer-Lieb, K.: Towards incorporating uncertainty of structural data in 3D geological inversion, *Tectonophysics*, 490(3–4), 141–151, doi:10.1016/j.tecto.2010.04.022, 2010.
- 10 Wellmann, J. F., Lindsay, M., Poh, J. and Jessell, M.: Validating 3-D Structural Models with Geological Knowledge for Improved Uncertainty Evaluations, *Energy Procedia*, 59, 374–381, doi:10.1016/j.egypro.2014.10.391, 2014.
- Wicki, T.: 3D-shear zone pattern in the Grimsel area: ductile to brittle deformation in granitic rocks, Master thesis, University of Bern, Switzerland., 2011.
- Wirsig, C., Zasadni, J., Ivy-Ochs, S., Christl, M., Kober, F. and Schlüchter, C.: A deglaciation model of the Oberhasli, Switzerland, *J. Quat. Sci.*, 31(1), 46–59, doi:10.1002/jqs.2831, 2016.
- 15 Yamamoto, J. K., Koike, K., Kikuda, A. T., da Cruz Campanha, G. A. and Endlen, A.: Post-processing for uncertainty reduction in computed 3D geological models, *Tectonophysics*, 633(1), 232–245, doi:10.1016/j.tecto.2014.07.013, 2014.
- Zanchi, A., Francesca, S., Stefano, Z., Simone, S. and Graziano, G.: 3D reconstruction of complex geological bodies: Examples from the Alps, *Comput. Geosci.*, 35(1), 49–69, doi:10.1016/j.cageo.2007.09.003, 2009.
- 20 Ziegler, M., Loew, S. and Moore, J. R.: Distribution and inferred age of exfoliation joints in the Aar Granite of the central Swiss Alps and relationship to Quaternary landscape evolution, *Geomorphology*, 201, 344–362, doi:10.1016/j.geomorph.2013.07.010, 2013.
